# Supplementary material for: Development of a supramolecular ensemble of an AIEE active hexaphenylbenzene derivative and Ag@Cu2O core–shell NPs: an efficient photocatalytic system for C–H activation
Source: Royal Society of Chemistry journal article supplement (doi:10.1039/c6cc03956a), 2016-01-01
Supplement: c6cc03956a1.pdf [file c6cc03956a1.pdf]

## **Electronic Supplementary information**

### **Development of supramolecular ensemble of AIEE active hexaphenylbenzene derivative and Ag@Cu<sub>2</sub>O core-shell NPs: An efficient photocatalytic system for C-H activation**

Radhika Chopra, Manoj Kumar and Vandana Bhalla\*

*Department of Chemistry, UGC-Centre for Advanced Studies, Guru Nanak Dev University, Amritsar, Punjab, India.*

*Email : [vanmanan@yahoo.co.in](mailto:vanmanan@yahoo.co.in)*

#### **Page No. Contents**

**S4-S7** General experimental procedure.

**S8** Comparison of catalytic activity of supramolecular ensemble **1a**:Ag@Cu<sub>2</sub>O core-shell NPs with other catalytic systems reported in literature for C-H functionalization of imidazole/benzimidazole derivatives.

**S9** Synthetic scheme of derivative **1a**.

**S10** Fluorescence spectra showing the variation of emission intensity of derivative **1** in H<sub>2</sub>O/THF mixture with different fractions of H<sub>2</sub>O and fluorescence spectra of derivative **1** showing the variation of emission intensity in TEG/THF mixture (0 to 90% volume fraction of TEG in THF).

**S11** Schematic diagram illustrating the preparation of Cu<sub>2</sub>O NPs and *in situ* generated supramolecular ensemble **1a**:Ag@Cu<sub>2</sub>O NPs from Benedict's solution on addition of aggregates of derivative **1** and UV-vis spectra with time for gradual addition of aggregates of derivative **1** to the aqueous solution of Benedict's reagent and AgNPs.

**S12** Graphical representation of rate of formation of Ag@Cu<sub>2</sub>O core-shell NPs.

**S13** X-Ray diffraction pattern of *in situ* generated Ag@Cu<sub>2</sub>O core-shell NP and TEM images of Ag@Cu<sub>2</sub>O core-shell NPs by varying the ratio of AgNPs:Benedict's solution.

- S14** UV-vis spectra of Ag@Cu<sub>2</sub>O core-shell NPs by varying the ratio of AgNPs:Benedict's solution.
- S15** Overlay NMR spectra of derivative **1** and residue obtained after filtration with THF/CHCl<sub>3</sub> mixture and fourier transforms infrared (FTIR) absorption spectrum of derivative **1** and Ag@Cu<sub>2</sub>O NPs.
- S16** Pictorial presentation illustrating the *in situ* generation of supramolecular ensemble **1a**:Ag@Cu<sub>2</sub>O NPs.
- S17** Table showing optimization of reaction conditions for C-H arylation of 1-methyl-1*H*-imidazole (**2**) with iodobenzene (**3a**) utilizing *in situ* generated supramolecular ensemble **1a**:Ag@Cu<sub>2</sub>O NPs as catalyst and table showing effect of thickness of shell on photocatalytic efficiency of *in situ* generated supramolecular ensemble **1a**:Ag@Cu<sub>2</sub>O NPs in C-H functionalization of 1-methyl-1*H*-imidazole (**2**) with **3a**.
- S18** Thermogravimetric analysis (TGA) of derivative **1** and supramolecular ensemble **1a**:Ag@Cu<sub>2</sub>O NPs.
- S19** TEM image and X-Ray diffraction pattern of Cu<sub>2</sub>O NPs stabilized by aggregates of derivative **1**.
- S20** Table showing influence of the stabilizing agent on the photocatalytic efficiency of Cu<sub>2</sub>O NPs and Ag@Cu<sub>2</sub>O NPs in C-H activation reaction and table showing C-H activation of 1-methyl-1*H*-imidazole (**2**) with haloarenes (**3a/3b/3c**) catalyzed by *in situ* generated supramolecular ensemble **1a**:Ag@Cu<sub>2</sub>O NPs in presence of visible light.
- S21** Recyclability of *in situ* generated supramolecular ensemble **1a**:Ag@Cu<sub>2</sub>O NPs as photocatalyst for synthesis of imidazole/benzimidazole derivatives and table showing

photocatalytic C-H activation of 1-phenyl-1*H*-benzo[*d*]imidazole (**5**) with haloarenes (**3a/3b/3c**) utilizing *in situ* generated supramolecular ensemble **1a**:Ag@Cu<sub>2</sub>O NPs.

**S22-26** <sup>1</sup>H NMR spectra of products (**4a-4e**) obtained after photocatalytic C-H activation of 1-methyl-1*H*-imidazole (**2**) with various haloarenes (**3a/3b/3c**) and substituted haloarenes (**3d-3g**).

**S27-31** <sup>1</sup>H NMR spectrum of products (**6a-6e**) obtained after C-H activation of 1-phenyl-1*H*-benzo[*d*]imidazole (**5**) with various haloarenes (**3b/3b/3c**) and substituted haloarenes (**3h-3k**).

**S32** <sup>1</sup>H NMR of derivative **1a**.

**S33** Mass spectrum of derivative **1a**.

## **General experimental Procedures:**

### **Materials :**

All reagents were purchased from Aldrich and were used without further purification. THF was dried over sodium using benzophenone and kept over molecular sieves overnight before use. For column chromatography, silica gel (60–120 mesh) was used.

### **Instruments :**

UV-vis spectra were recorded on a SHIMADZU UV-2450 spectrophotometer using a quartz cuvette (path length, 1 cm). The fluorescence spectra were obtained with a SHIMADZU 5301 PC spectrofluorimeter. TEM images were recorded from Transmission Electron Microscope (TEM)-JEOL 2100F. Infrared spectra were obtained on Varian 660-IR spectrometer using KBr pellets. Thermogravimetric analysis (TGA) was carried out on a EXSTAR TG/DTA 3600 at a heating rate of 10<sup>0</sup>C/min under nitrogen atmosphere. The amount of Ag and Cu in catalyst was determined by atomic absorption spectrophotometer (GBC Avant Ver 1.31). Sample preparation was done by reflux assisted digestion of 2 mg of catalyst with concentrated HNO<sub>3</sub>. The resulting solution was cooled, centrifuged and filtered. The filtrate was diluted to 10 times with deionized water. Photocatalytic experiments were carried out by using the 60 W tungsten filament bulb as irradiation source. Elemental analysis (C, H, N) was performed on a Flash EA 1112 CHNS-O analyzer (Thermo Electron Corp.). <sup>1</sup>H NMR was recorded on a JEOL-FT NMR-AL 300 MHz and Bruker (Avance II) FT-NMR 500 MHz spectrophotometer using CDCl<sub>3</sub>, CD<sub>3</sub>OD and DMSO-d<sub>6</sub> as solvents and tetramethylsilane (Si(CH<sub>3</sub>)<sub>4</sub>) for internal standards. Data was reported as follows: chemical shifts in ppm ( $\delta$ ) and coupling constants in Hz (*J*). Multiplicities of signals were expressed as follows: s = singlet, d = doublet and m = multiplet.

### **Synthesis of silver nanoparticles (AgNPs):**

The quasi-spherical AgNPs were prepared by reducing the AgNO<sub>3</sub> with aggregates of derivative **1** according to the previously reported method.<sup>1</sup> Aggregates of derivative **1** were prepared by dissolving derivative **1** (10 μM) in H<sub>2</sub>O:THF (7:3). To prepare AgNPs, 3 mL of aggregates of derivative **1** (10 μM) were added to 0.1 M AgNO<sub>3</sub> (60 μL). The reaction mixture so obtained was stirred at room temperature to yield greyish AgNPs. These AgNPs were washed with distilled water to remove unreacted AgNO<sub>3</sub> and were utilized as such in the formation of supramolecular ensemble **1a:Ag@Cu<sub>2</sub>O** NPs. As determined by AAS, the concentration of AgNPs solution was found to be 1.9 mM.

### **Preparation of Benedict's stock solution (1M):**

In a 100 mL volumetric flask, 10 g of Na<sub>2</sub>CO<sub>3</sub> and 17.3 g of sodium citrate dihydrate was dissolved in 85 mL of distilled water. To this mixture, aqueous solution of copper sulfate pentahydrate (1.73g dissolved in 10 mL of water) was added slowly with stirring. Finally, distilled water was added to bring the final volume upto 100 mL. The resulting solution was diluted further to prepare 0.04 M Benedict's solution which was used in the generation of supramolecular ensemble **1a:Ag@Cu<sub>2</sub>O** NPs.

### **Generation of supramolecular ensemble **1a:Ag@Cu<sub>2</sub>O** NPs:**

#### **(a) Ensemble consisting of **1a** and **Ag@Cu<sub>2</sub>O** NPs (1:1)**

6 mL of AgNPs (1.9 mM) and 0.6 mL of Benedict's solution (0.04 M) were mixed and stirred at room temperature for 5 min. To this reaction mixture, 0.6 mL of aggregates of derivative **1** (0.002 M) in H<sub>2</sub>O:THF (7:3) solution were added slowly with vigorous stirring. Immediately, color of solution was changed from dark blue to green indicating the generation of supramolecular ensemble **1a:Ag@Cu<sub>2</sub>O** NPs. Black coloured precipitates were observed after stirring the reaction

mixture continuously for 15 min. at room temperature. The resulting reaction mixture was sonicated to obtain homogeneous catalytic solution consisting of Ag@Cu<sub>2</sub>O NPs (1:1) and 3.5 mL of this catalytic solution was used as such for carrying out C-H activation reactions.

**(b) Ensemble consisting of 1a and Ag@Cu<sub>2</sub>O NPs (1:2)**

For preparation of photocatalytic ensemble having Ag@Cu<sub>2</sub>O NPs (1:2), 5 mL of AgNPs solution (1.9 mM), 0.8 mL of Benedict's solution (0.04 M) and 0.8 mL of aggregates of derivative **1** (0.002 M) in H<sub>2</sub>O:THF (7:3) solution were mixed and 3.5 mL of this solution was used as such for carrying out C-H activation reactions.

**(c) Ensemble consisting of 1a and Ag@Cu<sub>2</sub>O NPs (2:1)**

To generate photocatalytic ensemble consisting of Ag@Cu<sub>2</sub>O NPs (2:1), 16 mL of AgNPs (1.9 mM), 0.6 mL of Benedict's solution (0.04 M) and 0.6 mL of aggregates of derivative **1** (0.002 M) in H<sub>2</sub>O:THF (7:3) solution were mixed and 5.0 mL of this solution was used as such for carrying out photocatalytic C-H functionalization reactions.

**General experimental procedure for photocatalytic C-H functionalization reactions utilizing *in situ* generated supramolecular ensemble 1a:Ag@Cu<sub>2</sub>O NPs:**

In a 25 ml round-bottom flask (RBF), 1-methyl-1*H*-imidazole, **2** (1.0 equiv, 0.1 g), iodobenzene, **3a** (1.5 equiv) and KO<sup>t</sup>Bu (1.5 equiv) were mixed in 10 mL of H<sub>2</sub>O:toluene (7:3) solvent mixture in presence of 3.5 mL of *in situ* generated supramolecular ensemble **1a**:Ag@Cu<sub>2</sub>O NPs (0.02 mmol). After degassing the reaction mixture under vacuum for 2 min, the RBF was put in a water bath (to avoid heating effect) on magnetic stirrer and was irradiated with a 100 W tungsten filament bulb (0.4 W/cm<sup>2</sup>) to provide visible light for 5.5 h. After completion of the reaction, solvent was evaporated under reduced pressure and the resulting residue was dissolved in DCM. The organic layer was washed with water, dried over anhydrous Na<sub>2</sub>SO<sub>4</sub> and concentrated under

reduced pressure to yield the crude product which was recrystallized from DCM-hexane mixture to obtain pure product. The aqueous layer containing catalyst was reused as such for further photocatalytic reactions.

For preparation of imidazole and benzimidazole derivatives, reactants 1-methyl-1*H*-imidazole (**2**) and 1-phenyl-1*H*-benzimidazole (**5**) were synthesized according to previously reported methods.<sup>2</sup>

**Table S1 Comparison of catalytic activity of supramolecular ensemble 1a:Ag@Cu<sub>2</sub>O core shell NPs with other catalytic systems reported in literature for C-H functionalization of imidazole/benzimidazole.**

| Journal Name                                        | Catalyst                                           | Catalyst loading | Ligand/ base                                                | Temperature                 | Solvent                        | Time (in h) | Yield  |
|-----------------------------------------------------|----------------------------------------------------|------------------|-------------------------------------------------------------|-----------------------------|--------------------------------|-------------|--------|
| Present Manuscript                                  | Ag@Cu <sub>2</sub> O core shell NPs                | 0.02 mmol        | KO <sup>t</sup> Bu                                          | Visible light               | Toluene-H <sub>2</sub> O (3:7) | 5-7         | 45-82% |
| <i>ACS Catal.</i> , <b>2016</b> , 6, 709            | [Cp* <sup>+</sup> RhCl <sub>2</sub> ] <sub>2</sub> | 0.003 mmol       | NaOAc, AgOTf                                                | 110°C (under Ar atmosphere) | DCE                            | 24          | 47-96% |
| <i>Org. Biomol. Chem.</i> , <b>2016</b> , 14, 1814  | [Cp* <sup>+</sup> RhCl <sub>2</sub> ] <sub>2</sub> | 5 mol%           | Cu(OAc) <sub>2</sub> ·H <sub>2</sub> O                      | 110°C (under Ar atmosphere) | Toluene                        | 12          | 5-97%  |
| <i>Chem. Sci.</i> , <b>2015</b> , 6, 6792           | Ni(cod) <sub>2</sub>                               | 10 mol%          | Dcype, K <sub>3</sub> PO <sub>4</sub>                       | 110°C                       | t-AmylOH                       | 12-36       | 53-95% |
| <i>Org. Biomol. Chem.</i> , <b>2015</b> , 13, 7695  | [Cp* <sup>+</sup> RhCl <sub>2</sub> ] <sub>2</sub> | 5 mol%           | Cu(OAc) <sub>2</sub> ·H <sub>2</sub> O                      | 80°C (under Ar atmosphere)  | t-AmylOH                       | 4-12        | 53-99% |
| <i>Adv. Synth. Catal.</i> , <b>2015</b> , 357, 3885 | [(p-cymene)RuCl <sub>2</sub> ] <sub>2</sub>        | 10 mol%          | AgSbF <sub>6</sub> , Cu(OAc) <sub>2</sub> ·H <sub>2</sub> O | 140°C                       | MeOH                           | 24          | 68-99% |
| <i>J. Org. Chem.</i> , <b>2014</b> , 79, 5806       | [NHC-Pd(II)-Im]                                    | 2-4 mol%         | KO <sup>t</sup> Bu                                          | 120°C                       | Toluene-H <sub>2</sub> O       | 6-12        | 42-99% |
| <i>Org. Biomol. Chem.</i> , <b>2013</b> , 11, 2249  | [Cp* <sup>+</sup> RhCl <sub>2</sub> ] <sub>2</sub> | 3 mol%           | Cu(OAc) <sub>2</sub> , PivOH                                | 140°C                       | Mesitylene                     | 24          | 49-84% |
| <i>Tetrahedron</i> <b>2008</b> , 64, 6060           | Pd(OAc) <sub>2</sub>                               | 10 mol%          | P(2-furyl) <sub>3</sub> , K <sub>2</sub> CO <sub>3</sub>    | 140°C                       | DMF                            | 27-87       | 43-73% |



### Synthetic scheme of derivative 1a:

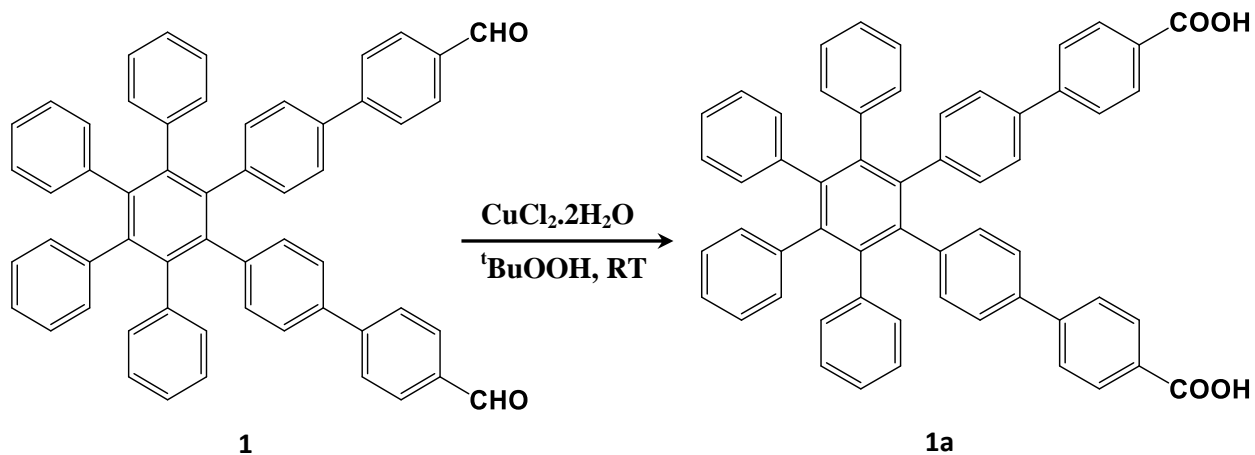

**Procedure:** A solution of derivative **1** (0.1 g, 0.05 mmol) and  $\text{CuCl}_2 \cdot 2\text{H}_2\text{O}$  (28 mg, 0.06 mmol) were mixed in THF. To this mixture, aqueous  $\text{tBuOOH}$  (12.15  $\mu\text{L}$ , 0.05 mmol) was added. The resulting mixture was allowed to stir at room temperature for 24 h until the starting material disappeared (as indicated by TLC). After completion of the reaction, the residual solvent was evaporated. The crude product so obtained was treated with DCM and water. The organic layer was collected by adjusting the pH to 8.0-8.5. The organic layer was concentrated, dried over anhydrous  $\text{Na}_2\text{SO}_4$  and purified by column chromatography to yield the derivative **1a** (0.06 g in 57.5% yield); m.p.  $>280^\circ\text{C}$ .  $^1\text{H}$  NMR (500 MHz,  $\text{CDCl}_3$ , ppm)  $\delta = 7.73$  (d, 4H,  $J = 8.0$  Hz), 7.32 (d, 4H,  $J = 8.0$  Hz), 7.02 (d, 4H,  $J = 8.0$  Hz), 6.80 (d, 4H,  $J = 8.0$  Hz), 6.67-6.70 (m, 20H);  $m/z = 775.4733$   $[\text{M} + \text{H}]^+$ ; Elemental Analysis: Calcd for  $\text{C}_{56}\text{H}_{38}\text{O}_4$ : C 86.80; H 4.94; O 8.26. Found: C 86.78; H 4.93; O 8.23.

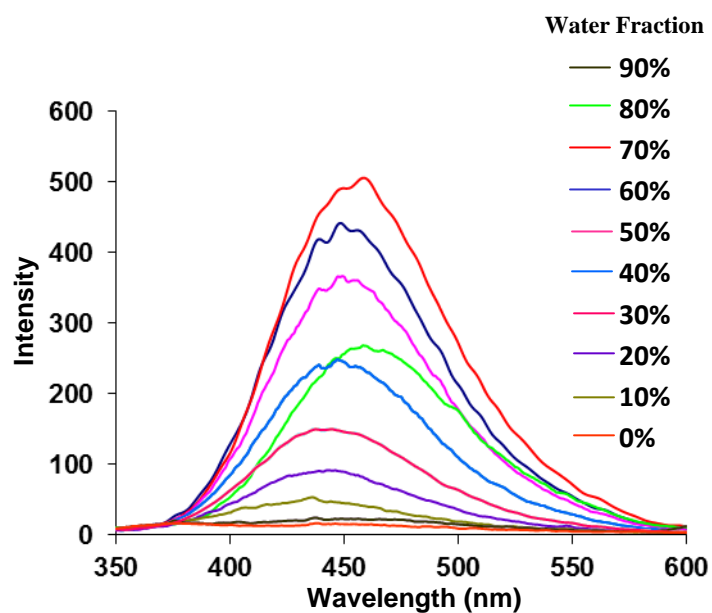

**Fig. S1** Fluorescence spectra showing the variation of emission intensity of derivative **1** (5  $\mu$ M) in H<sub>2</sub>O/THF mixture with different fractions of H<sub>2</sub>O;  $\lambda_{\text{ex}} = 305$  nm.

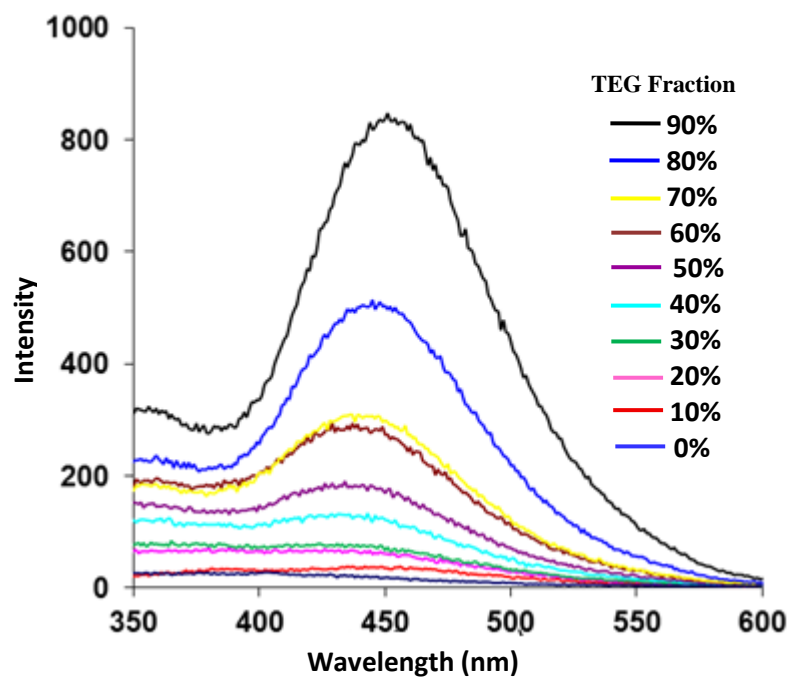

**Fig. S2** Fluorescence spectra of derivative **1** (5  $\mu$ M) showing the variation of emission intensity in TEG/THF mixture (0 to 90% volume fraction of TEG in THF);  $\lambda_{\text{ex}} = 305$  nm.

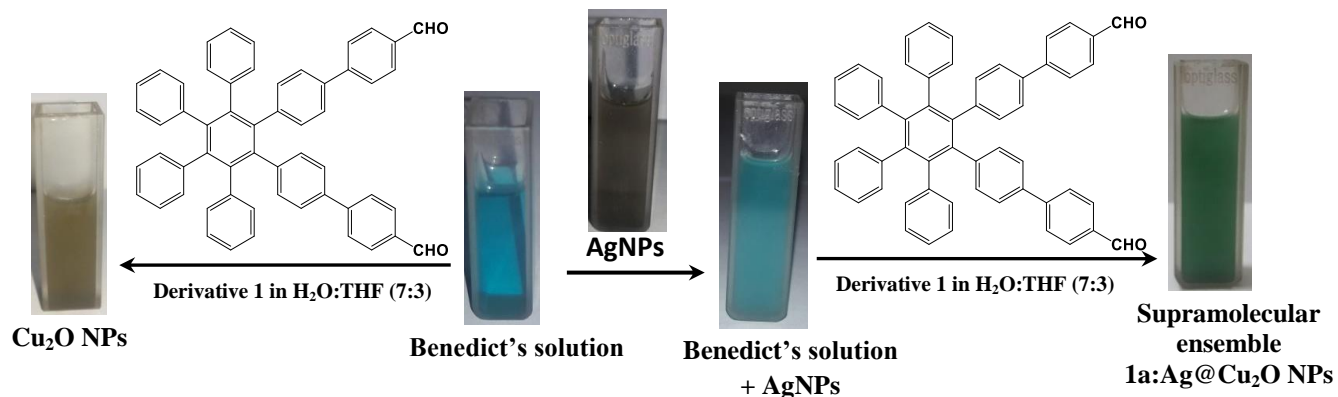

**Fig. S3** Schematic diagram illustrating the generation of Cu<sub>2</sub>O NPs and *in situ* generated supramolecular ensemble **1a**:Ag@Cu<sub>2</sub>O NPs from Benedict's solution on addition of aggregates of derivative **1**.

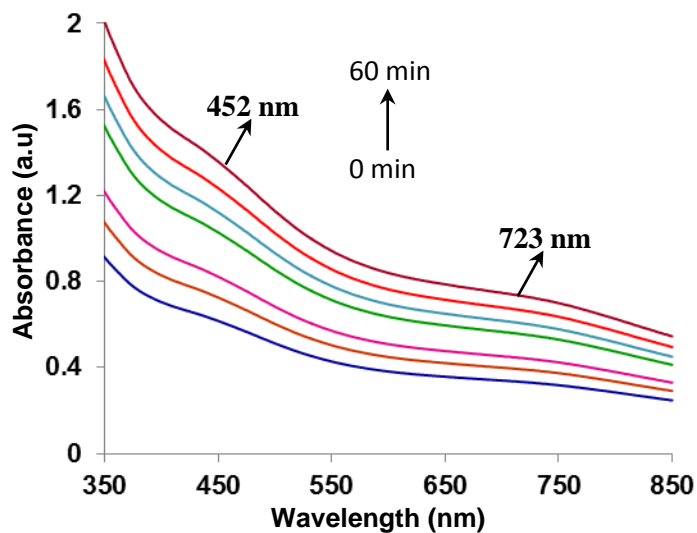

**Fig. S4** UV-vis spectra with time for gradual addition of aggregates of derivative **1** (5 μM) to the aqueous solution of Benedict's reagent and AgNPs.

| Regression Statistics |          |
|-----------------------|----------|
| Multiple R            | 0.996139 |
| R Square              | 0.992294 |
| Intercept             | 0.603839 |
| Slope                 | 0.012527 |

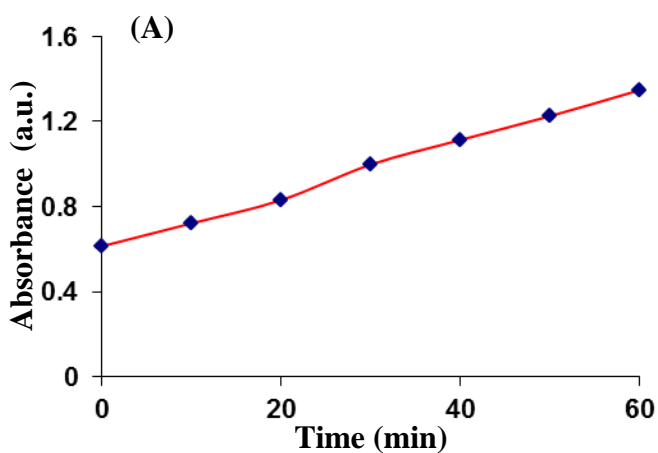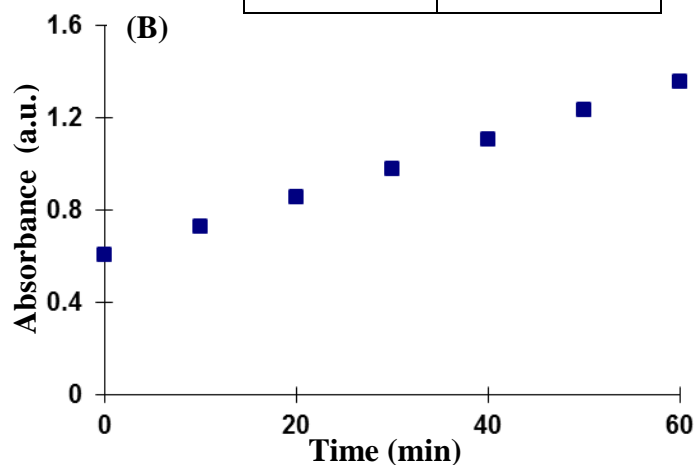

**Fig. S5** Graphical representation of rate of formation of Ag@Cu<sub>2</sub>O core-shell NPs (A) Time (min.) vs. absorbance plot at 452 nm (B) regression plot of A.

The first order<sup>3</sup> rate constant for the formation of Ag@Cu<sub>2</sub>O NPs was calculated from the change of intensity of absorbance of Benedict's reagent and AgNPs in the presence of aggregates of derivative **1** at different time interval.<sup>4</sup>

From the time vs. absorbance plot at fixed wavelength 452 nm by using first order rate equation, we get the rate constant =  $k = \text{slope} \times 2.303 = 4.80 \times 10^{-4} \text{ s}^{-1}$ .

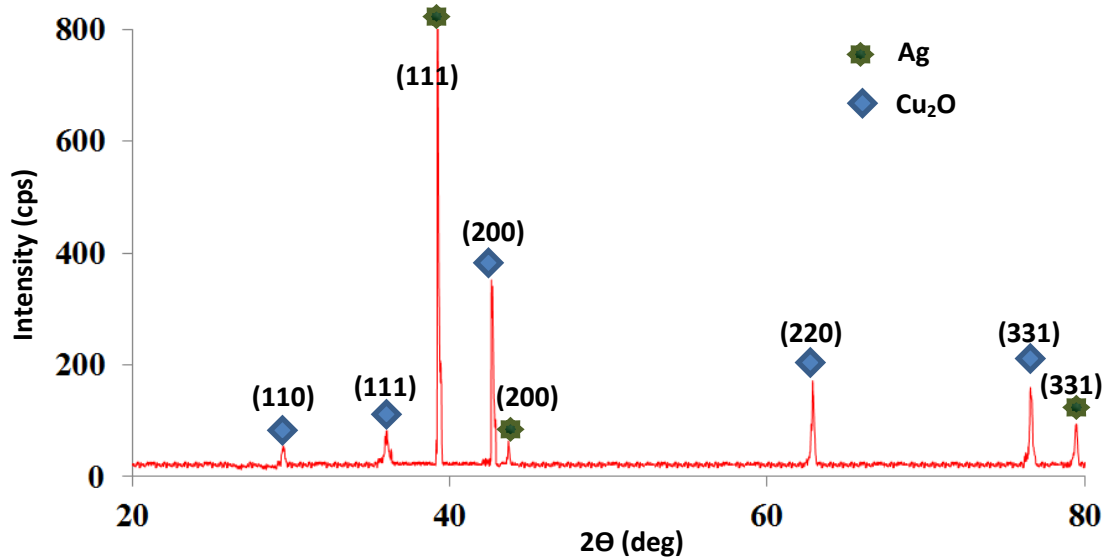

**Fig. S6** X-Ray diffraction pattern of *in situ* generated Ag@Cu<sub>2</sub>O core shell NPs.

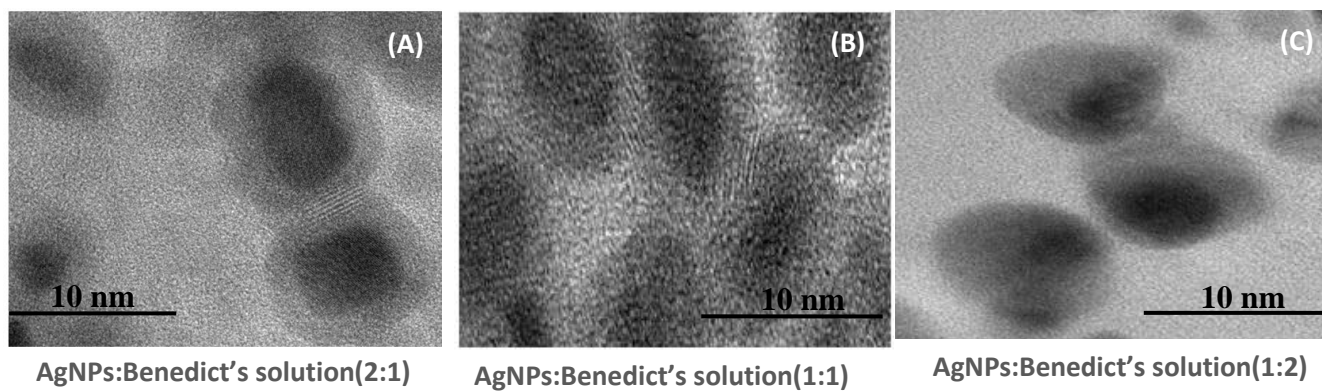

**Fig. S7** TEM images of Ag@Cu<sub>2</sub>O core shell NPs by varying the ratio of AgNPs:Benedict's solution.

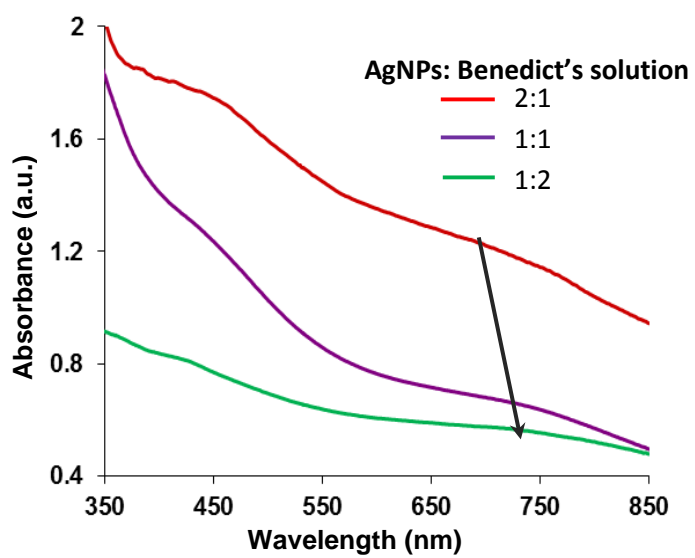

**Fig. S8** UV-vis spectra of Ag@Cu<sub>2</sub>O core-shell NPs by varying the ratio of AgNPs: Benedict's solution.

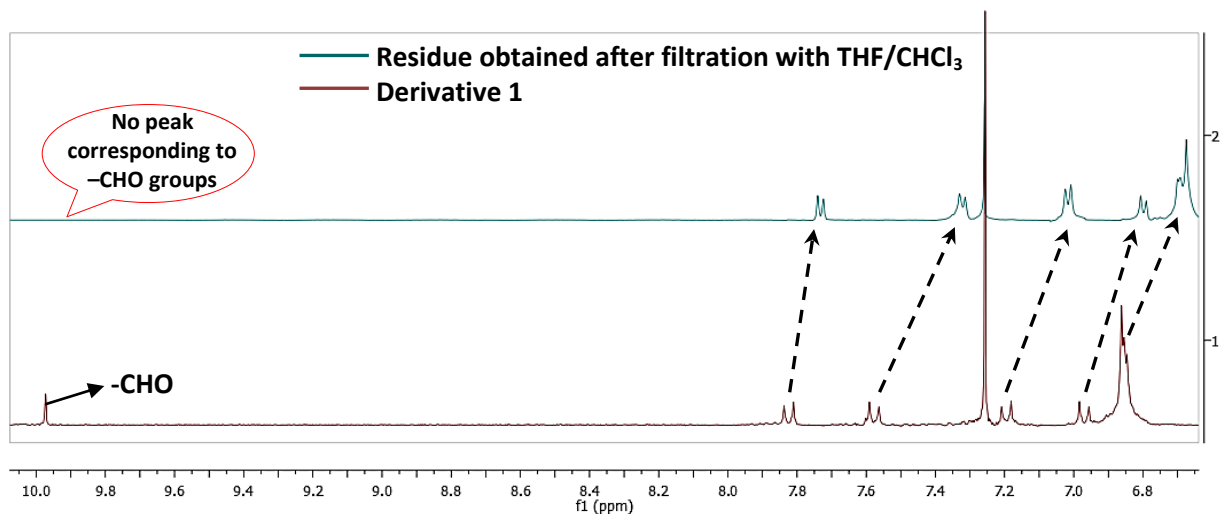

**Fig. S9** Overlay NMR spectra of derivative **1** and residue obtained after filtration with THF/CHCl<sub>3</sub> mixture.

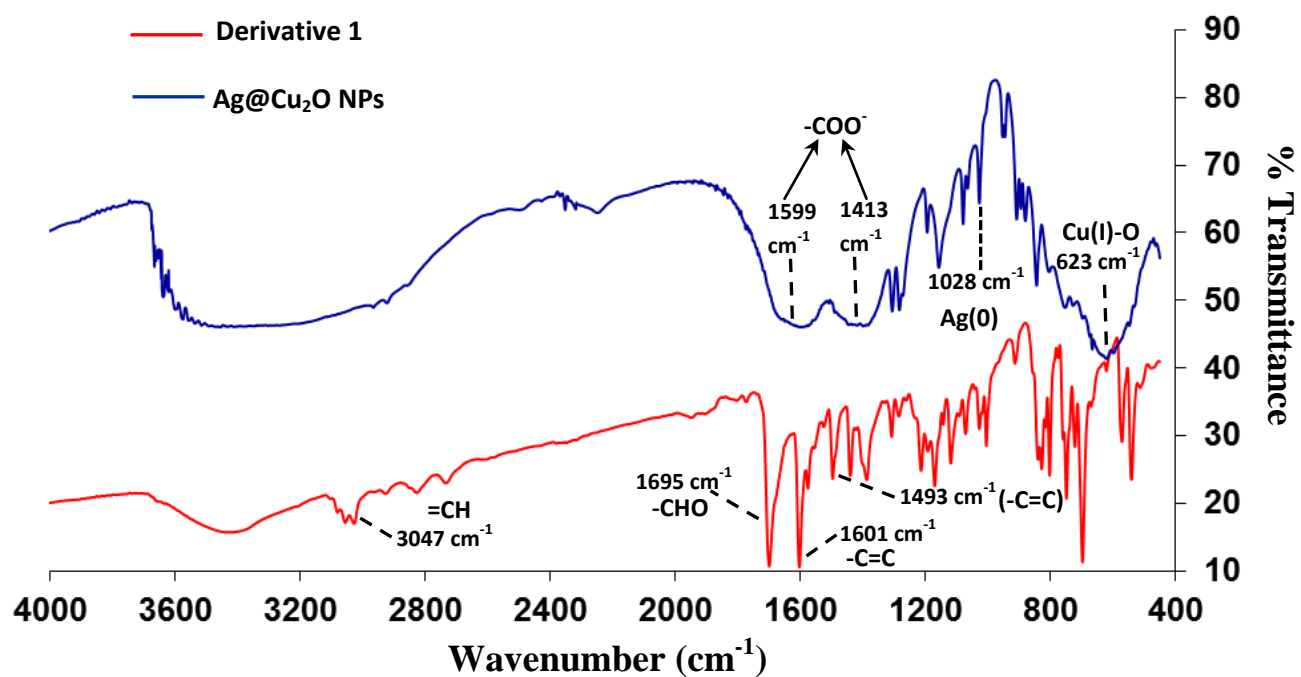

**Fig. S10** Fourier transform infrared (FTIR) absorption spectrum of derivative **1** and Ag@Cu<sub>2</sub>O NPs.

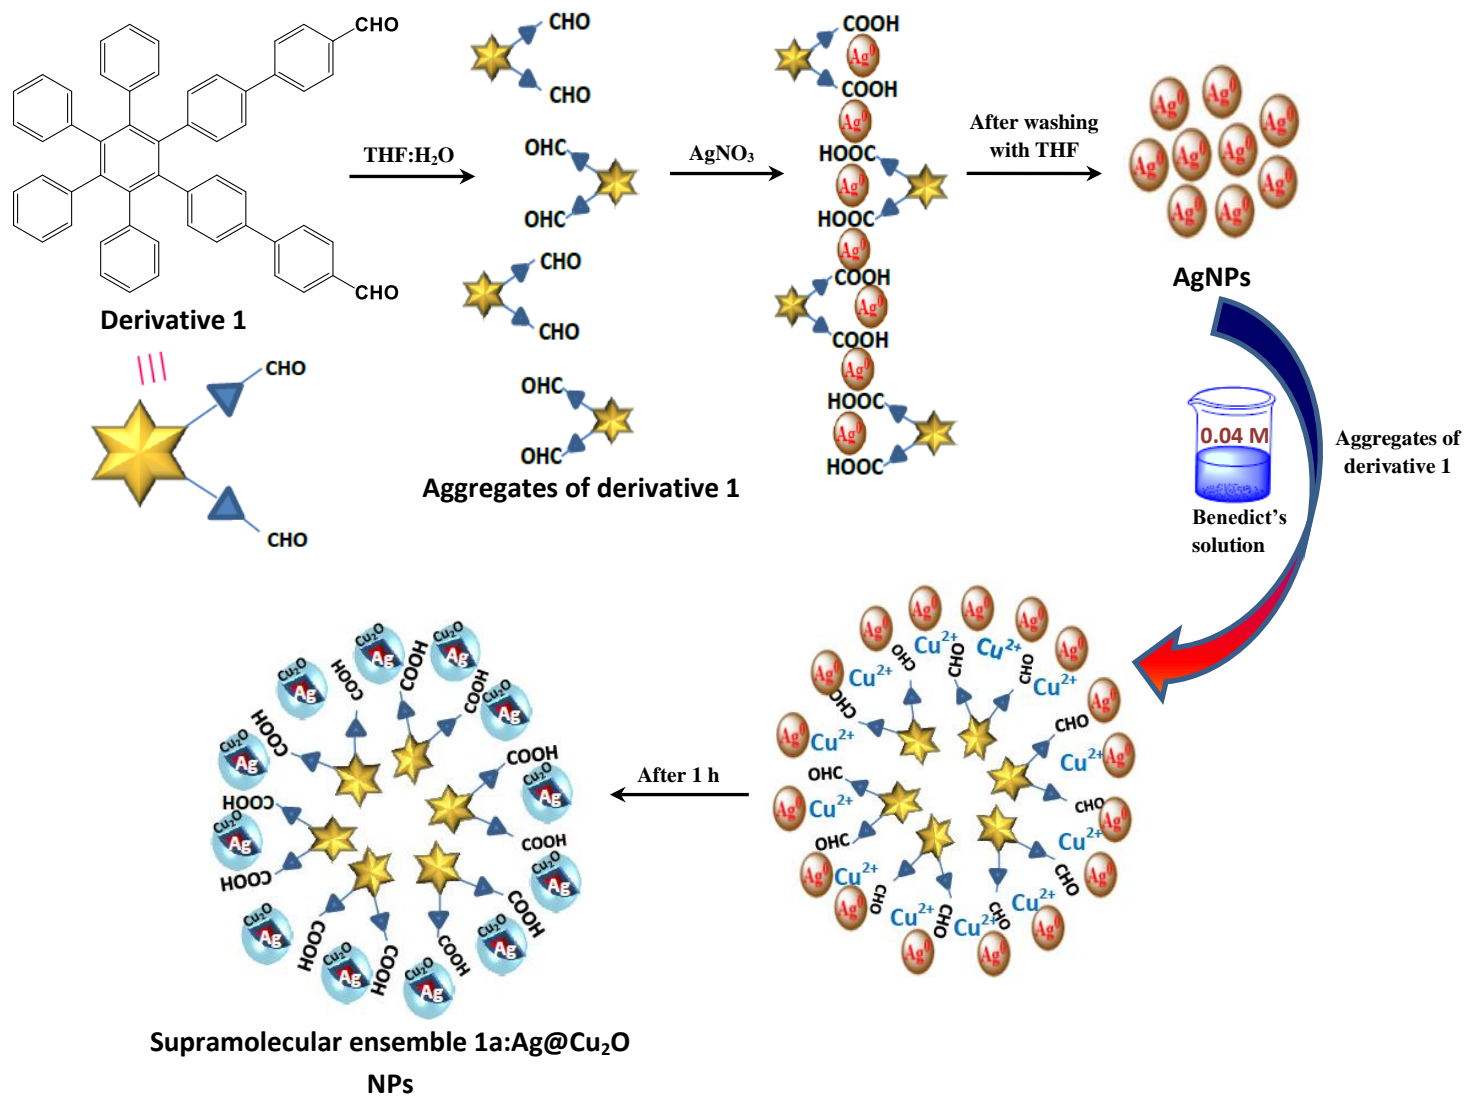

**Fig. S11** Pictorial presentation illustrating the *in situ* generation of supramolecular ensemble **1a:Ag@Cu<sub>2</sub>O** NPs.



**Table S2 Optimization of reaction conditions for C-H arylation of 1-methyl-1*H*-imidazole (2) with iodobenzene (3a) utilizing *in situ* generated supramolecular ensemble 1a:Ag@Cu<sub>2</sub>O NPs as catalyst.**

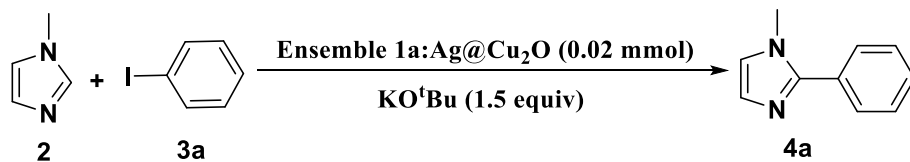

| S. No. | Solvent                        | Temperature        | Time  | Yield |
|--------|--------------------------------|--------------------|-------|-------|
| 1.     | Toluene                        | 150 <sup>0</sup> C | 8 h   | 73%   |
| 2.     | DMF                            | 150 <sup>0</sup> C | 15 h  | 48%   |
| 3.     | H <sub>2</sub> O:EtOH          | 90 <sup>0</sup> C  | 24 h  | -     |
| 4.     | H <sub>2</sub> O:toluene (7:3) | 150 <sup>0</sup> C | 15 h  | 45%   |
| 5.     | H <sub>2</sub> O:toluene (7:3) | Visible light      | 5.5 h | 80%   |

**Table S3 Effect of thickness of shell on photocatalytic efficiency of *in situ* generated supramolecular ensemble 1a:Ag@Cu<sub>2</sub>O NPs in C-H functionalization of 1-methyl-1*H*-imidazole (2) with 3a.**

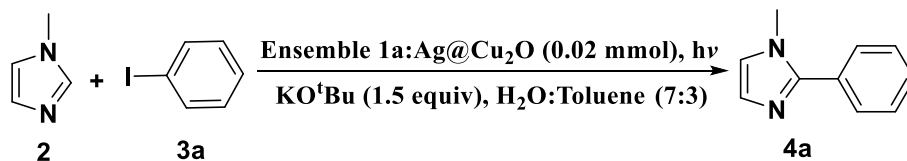

| S. No. | Ensemble 1a:Ag@Cu <sub>2</sub> O NPs (AgNPs: Benedict's solution) | Time  | Yield | TOF (h <sup>-1</sup> ) |
|--------|-------------------------------------------------------------------|-------|-------|------------------------|
| 1.     | 1:1                                                               | 5.5 h | 80%   | 8.88                   |
| 2.     | 1:2                                                               | 5.5 h | 84%   | 9.32                   |
| 3.     | 2:1                                                               | 5.5 h | 75%   | 8.33                   |

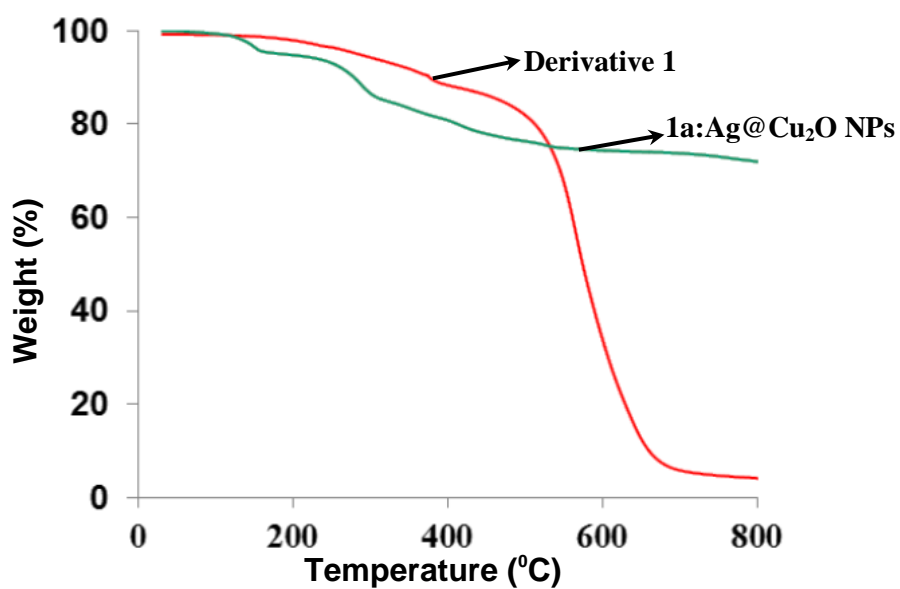

**Fig. S12** Thermogravimetric analysis (TGA) of derivative **1** and supramolecular ensemble **1a:Ag@Cu<sub>2</sub>O NPs**.

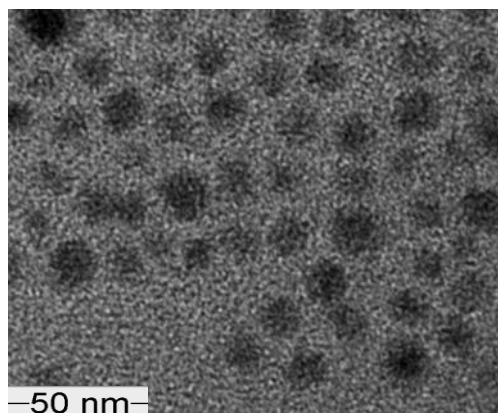

**Fig. S13** TEM image showing spherical shape of Cu<sub>2</sub>O NPs stabilized by aggregates of derivative **1**; scale bar 50 nm.

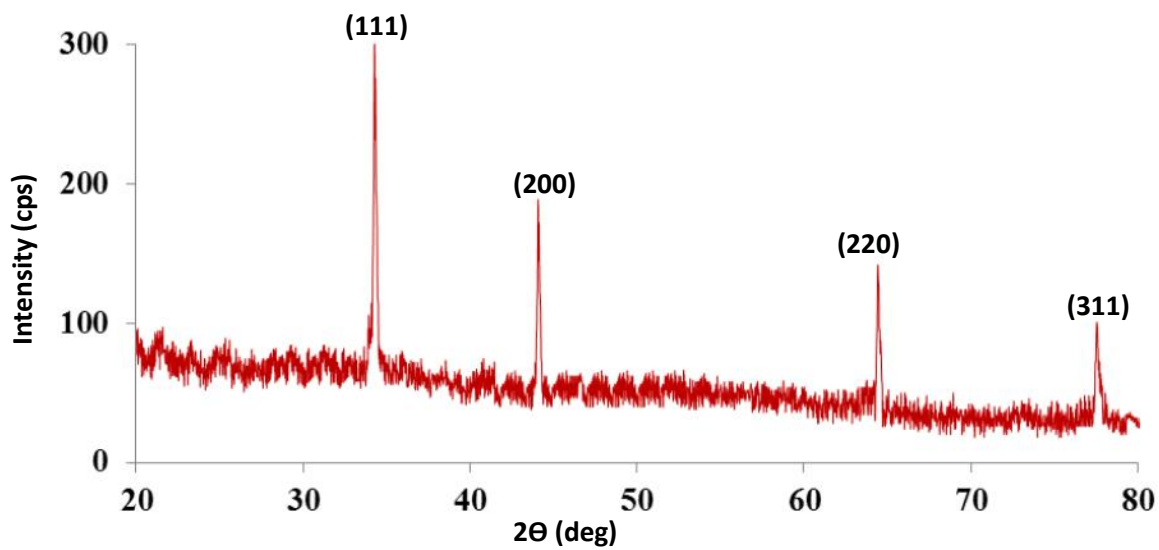

**Fig. S14** X-Ray diffraction pattern of Cu<sub>2</sub>O NPs stabilized by aggregates of derivative **1**.

**Table S4 Influence of the stabilizing agent on the photocatalytic efficiency of Cu<sub>2</sub>O NPs and Ag@Cu<sub>2</sub>O NPs in C-H activation reaction.**

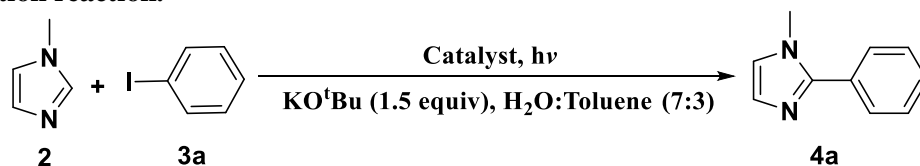

| S. No.    | Catalyst                                                                    | Yield      | Time         |
|-----------|-----------------------------------------------------------------------------|------------|--------------|
| 1.        | Cu <sub>2</sub> O NPs stabilized by aggregates of derivative <b>1</b>       | 23%        | 24 h         |
| <b>2.</b> | <b>Supramolecular ensemble 1a:Ag@Cu<sub>2</sub>O NPs</b>                    | <b>80%</b> | <b>5.5 h</b> |
| 3.        | Aggregates of derivative <b>1</b>                                           | -          | 20 h         |
| 4.        | Aggregates of oxidized derivative <b>1a</b>                                 | -          | 20 h         |
| 5.        | Bare Ag@Cu <sub>2</sub> O NPs                                               | 32%        | 20 h         |
| 6.        | Bare Ag@Cu <sub>2</sub> O NPs + aggregates of derivative <b>1</b>           | 34 %       | 14 h         |
| 7.        | Bare Ag@Cu <sub>2</sub> O NPs + aggregates of oxidized derivative <b>1a</b> | 78 %       | 8 h          |
| 8.        | Ag@Cu <sub>2</sub> O NPs stabilized by aggregates of pentacenequinone       | 42%        | 16 h         |

Bare Ag@Cu<sub>2</sub>O<sup>5</sup>; Ag@Cu<sub>2</sub>O NPs stabilized by aggregates of pentacenequinone<sup>6</sup>

**Table S5 C-H activation of 1-methyl-1H-imidazole (2) with haloarenes (3a/3b/3c) catalyzed by *in situ* generated supramolecular ensemble 1a:Ag@Cu<sub>2</sub>O NPs in presence of visible light.**

| S. No. | Reactant 1 | Reactant 2 | Product | Yield | Time  |
|--------|------------|------------|---------|-------|-------|
| 1.     |            |            |         | 84%   | 5.5 h |
| 2.     |            |            |         | 68%   | 6 h   |
| 3.     |            |            |         | 48%   | 7 h   |

**Reaction conditions:** **1** (1.0 equiv), **2** (1.5 equiv), **catalyst:** Supramolecular ensemble **1a:Ag@Cu<sub>2</sub>O NPs** (0.02 mmol), **Base:** KO<sup>t</sup>Bu (1.5 equiv), H<sub>2</sub>O:toluene (7:3) under visible light.

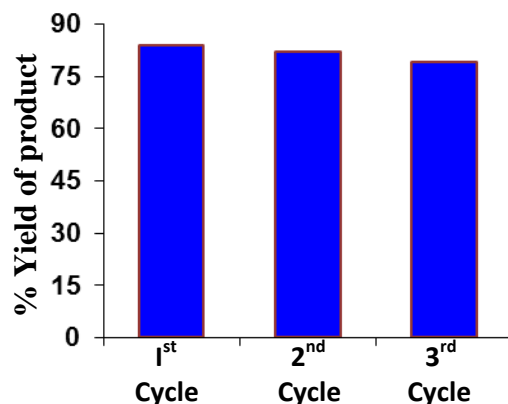

**Fig. S15** Recyclability of *in situ* generated supramolecular ensemble **1a**:Ag@Cu<sub>2</sub>O NPs as photocatalyst for synthesis of imidazole/benzimidazole derivatives.

**Table S6** Photocatalytic C-H activation of 1-phenyl-1*H*-benzo[*d*]imidazole (**5**) with haloarenes (**3a/3b/3c**) utilizing *in situ* generated supramolecular ensemble **1a**:Ag@Cu<sub>2</sub>O NPs.

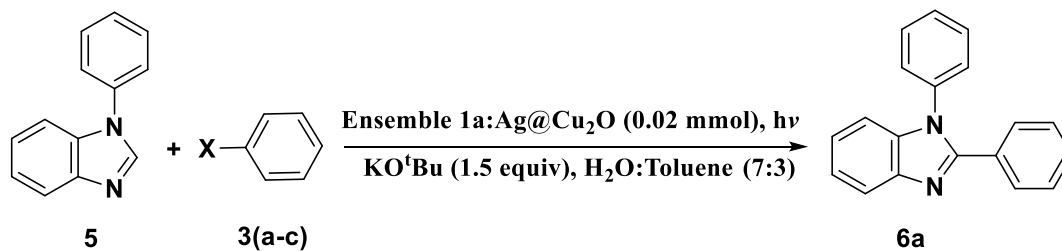

| S. No. | X                 | Time (h) | Yield |
|--------|-------------------|----------|-------|
| 1.     | -I ( <b>3a</b> )  | 4.5 h    | 82%   |
| 2.     | -Br ( <b>3b</b> ) | 6 h      | 74%   |
| 3.     | -Cl ( <b>3c</b> ) | 7 h      | 57%   |

Compound **4a**.<sup>7</sup> 1-methyl-2-phenyl-1*H* imidazole: (0.131 g in 68% yield). <sup>1</sup>H NMR (300 MHz, CDCl<sub>3</sub>, ppm): δ = 7.61 (d, 2H, J = 8.1 Hz), 7.37–7.44 (m, 3H), 7.12 (s, 1H), 6.97 (s, 1H), 3.72 (s, 3H).

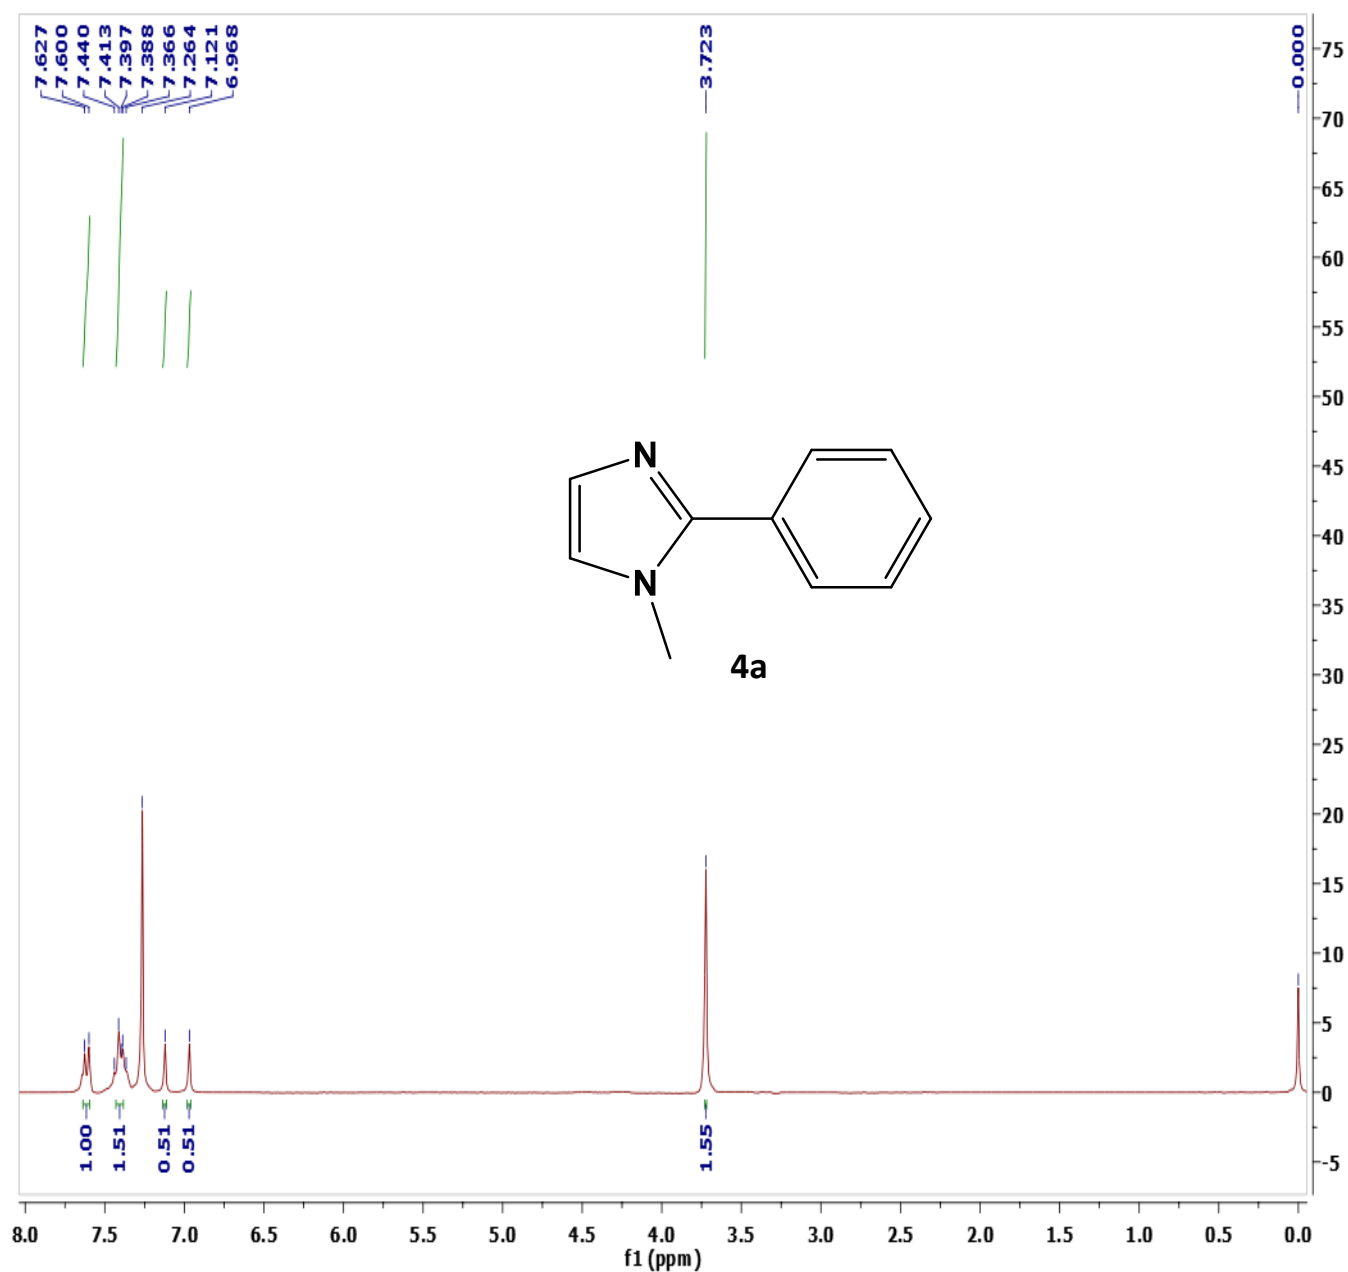

**Fig. S16** <sup>1</sup>H NMR of compound **4a** in CDCl<sub>3</sub>.

Compound **4b**.<sup>8</sup> 4-(1-methyl-1*H*-imidazol-2-yl)phenol: (0.172 g in 81% yield). <sup>1</sup>H NMR (500 MHz, CD<sub>3</sub>OD, ppm): δ = 7.72 (d, 1H, J = 9.0 Hz), 7.44-7.47 (m, 4H), 7.00 (d, 1H, J = 9.0 Hz), 3.72 (s, 3H).

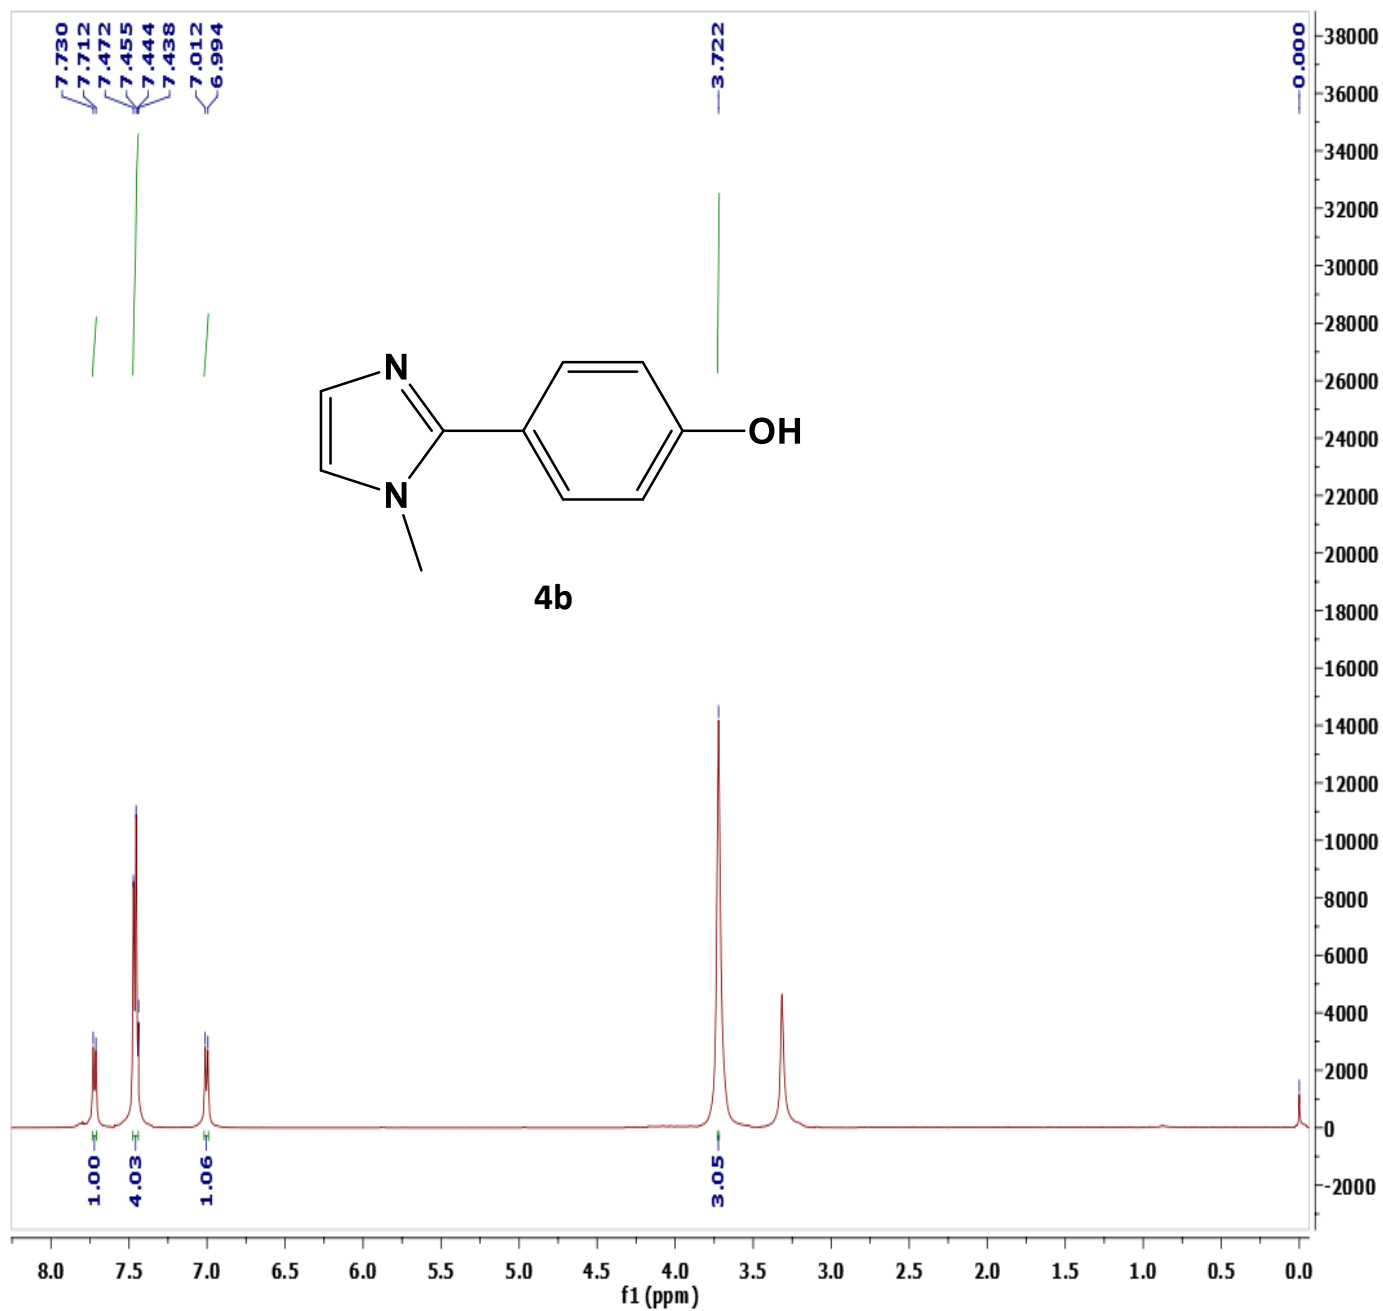

Fig. S17 <sup>1</sup>H NMR of compound **4b** in CD<sub>3</sub>OD.

Compound **4c**.<sup>9</sup> 1-Methyl-2-(*p*-tolyl)imidazole: (0.168 g in 80% yield). <sup>1</sup>H NMR (300 MHz, CDCl<sub>3</sub>, ppm): δ = 7.46 (d, 2H, J = 8.1 Hz), 7.18-7.22 (m, 2H), 7.03 (d, 1H, J = 0.9 Hz), 6.85 (d, 1H, J = 0.9 Hz), 3.65 (s, 3H), 2.22 (s, 3H).

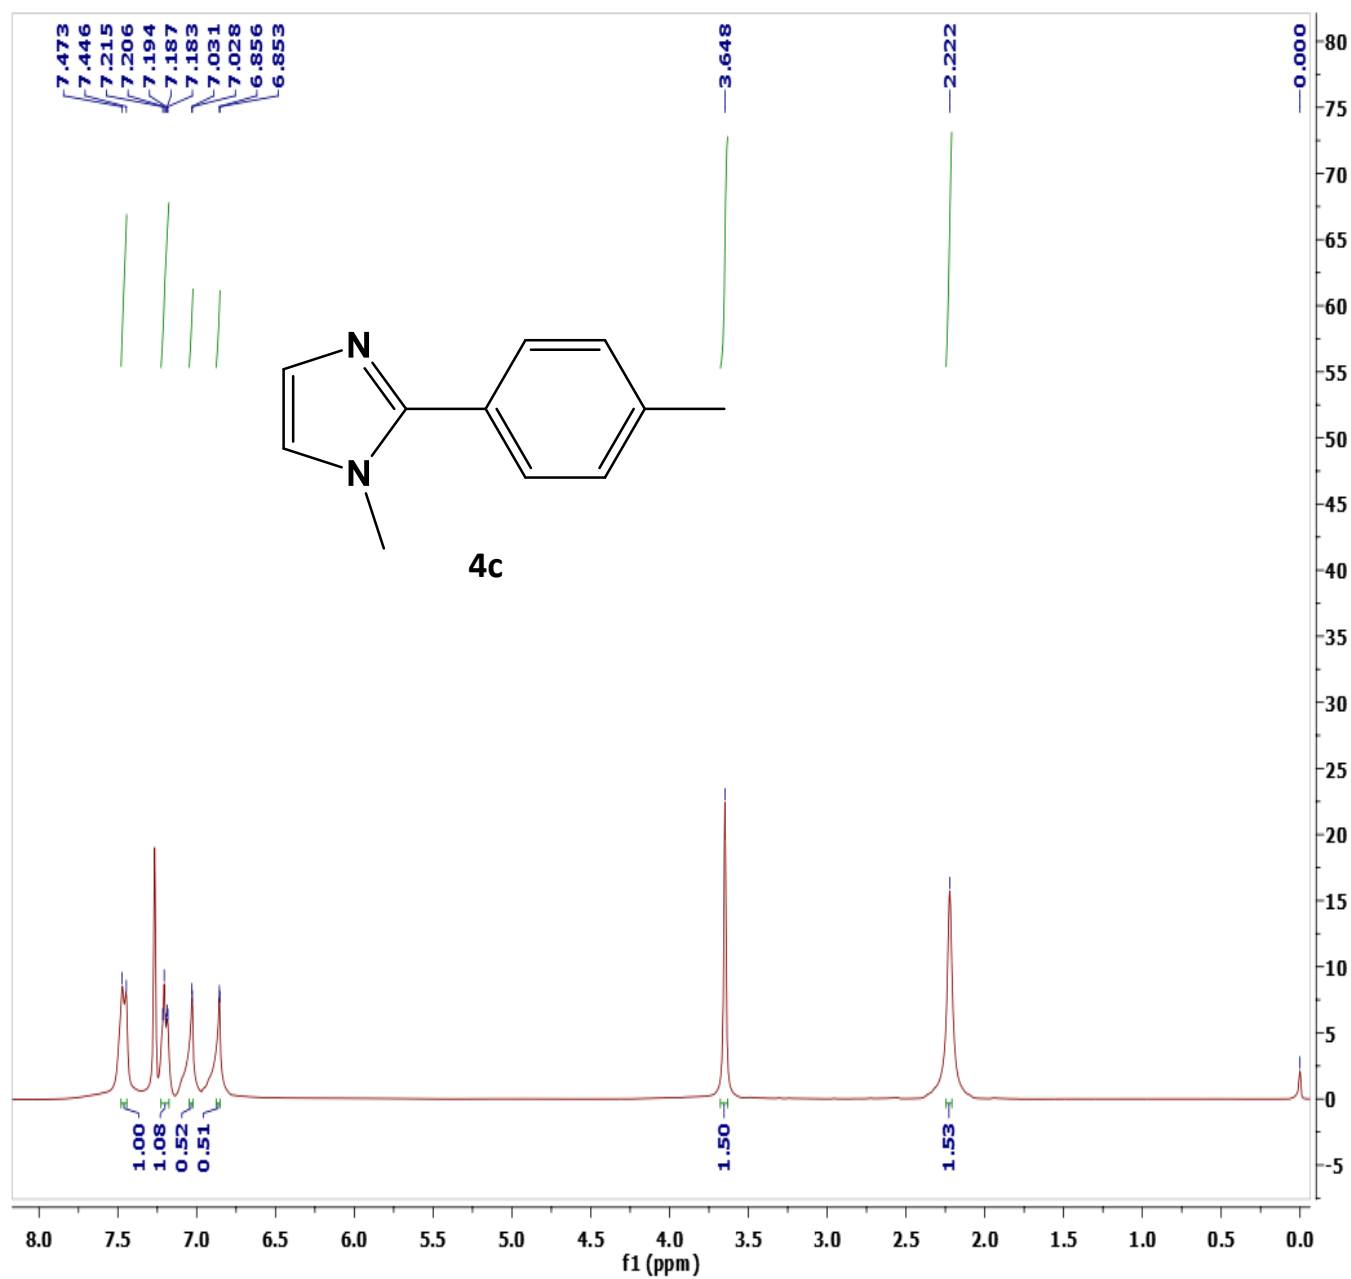

Fig. S18 <sup>1</sup>H NMR of compound **4c** in CDCl<sub>3</sub>.



Compound **4d**.<sup>8</sup> 2-(4-methoxyphenyl)-1-methyl-1*H*-imidazole: (0.188 g in 82% yield). <sup>1</sup>H NMR (500 MHz, CDCl<sub>3</sub>, ppm): δ = 7.58 (d, 2H, J = 9.0 Hz), 7.09 (s, 1H), 6.98 (d, 2H, J = 9.0 Hz), 6.93 (s, 1H), 3.84 (s, 3H), 3.73 (s, 3H).

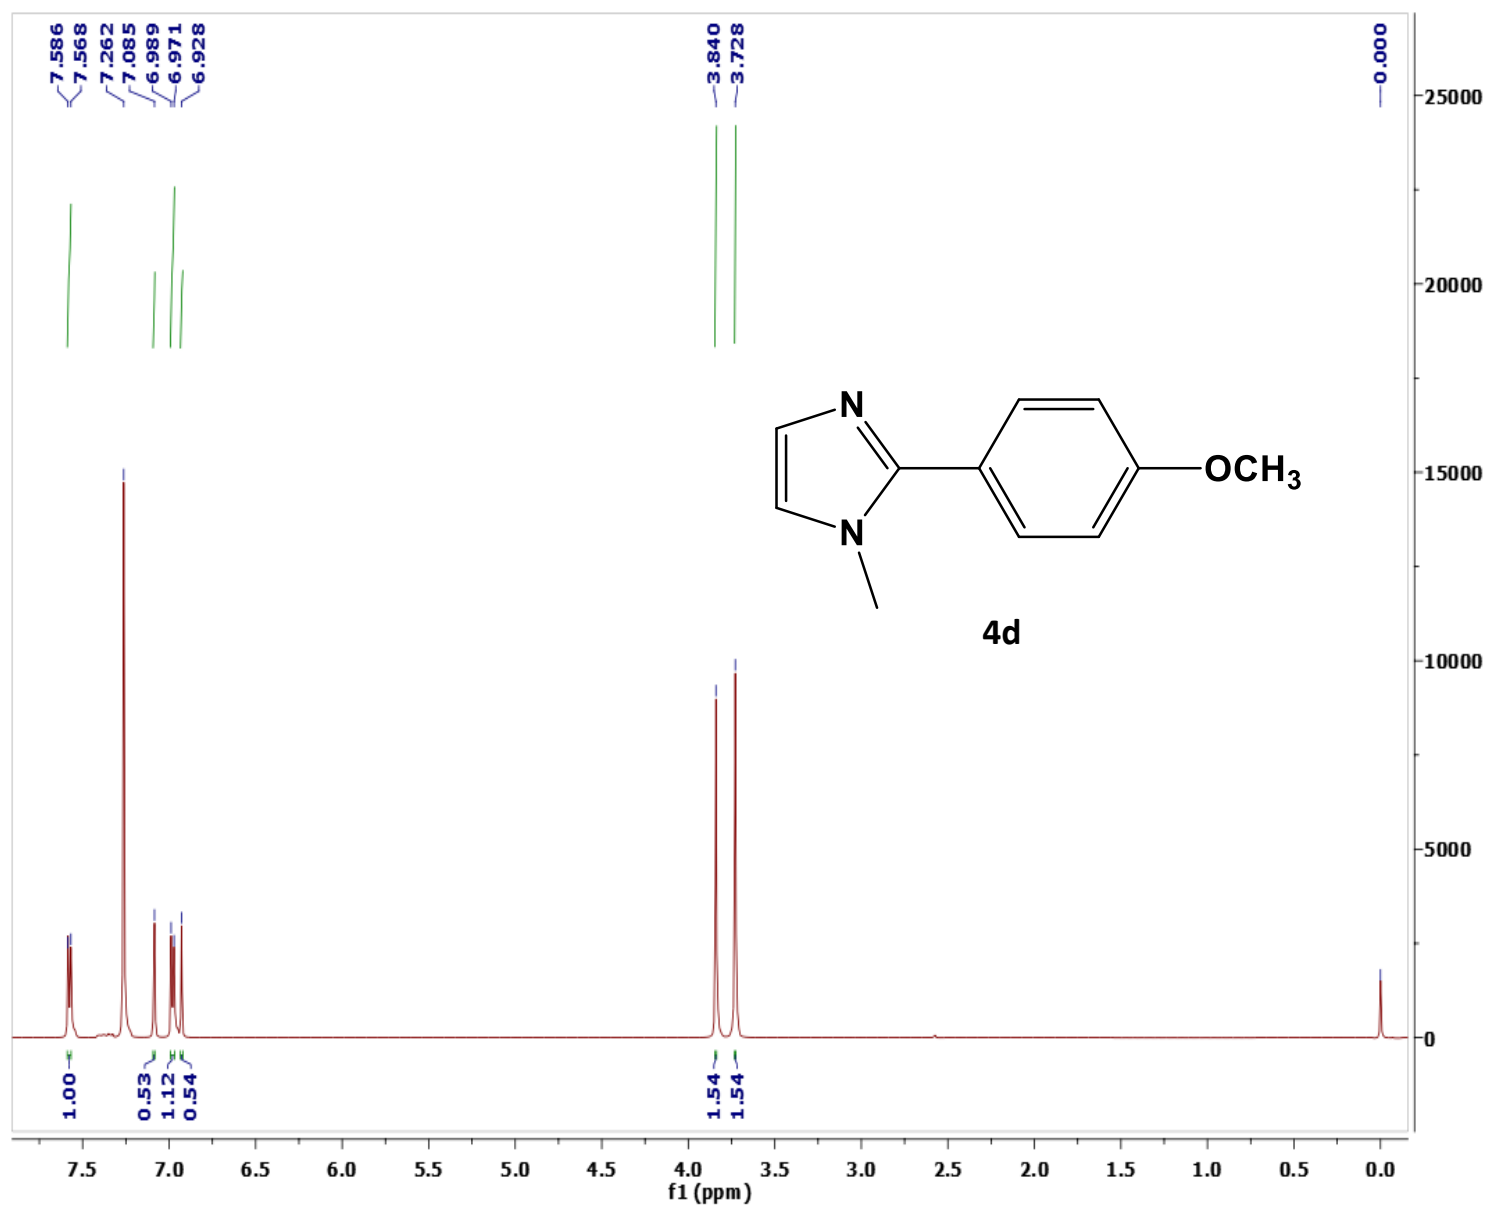

**Fig. S19** <sup>1</sup>H NMR of compound **4d** in CDCl<sub>3</sub>.

Compound **4e**.<sup>10</sup> 4-(1-Methylimidazol-2-yl)benzonitrile: (0.138 g in 62% yield). <sup>1</sup>H NMR (300 MHz, CDCl<sub>3</sub>, ppm): δ = 7.63-7.94 (m, 4H), 7.14 (s, 1H), 7.00 (s, 1H), 3.79 (s, 3H).

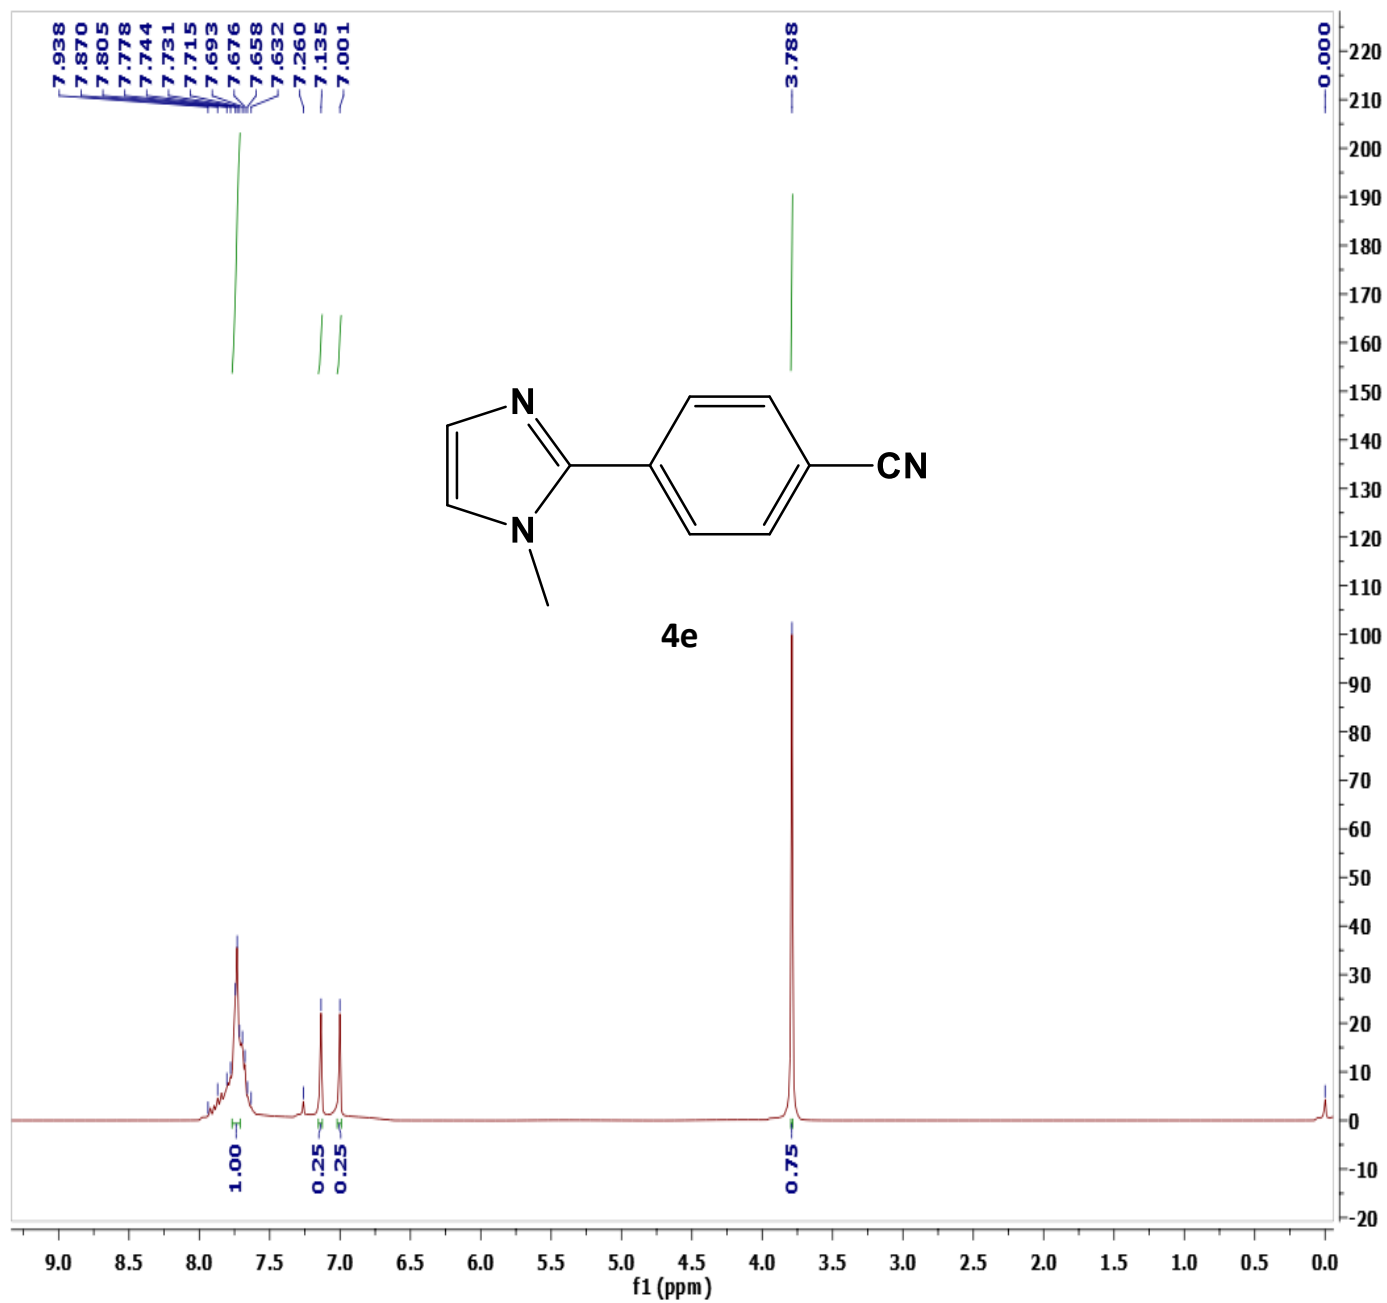

Fig. S20 <sup>1</sup>H NMR of compound **4e** in CDCl<sub>3</sub>.

Compound **6a**.<sup>11</sup> 1,2-Diphenyl-1*H*-benzo[*d*]imidazole: (0.104 g in 74% yield). <sup>1</sup>H NMR (300 MHz, CDCl<sub>3</sub>, ppm): δ = 7.90 (d, 1H, J = 7.2 Hz), 7.60 (d, 2H, J = 8.4 Hz), 7.45–7.54 (m, 3H), 7.23–7.40 (m, 8H).

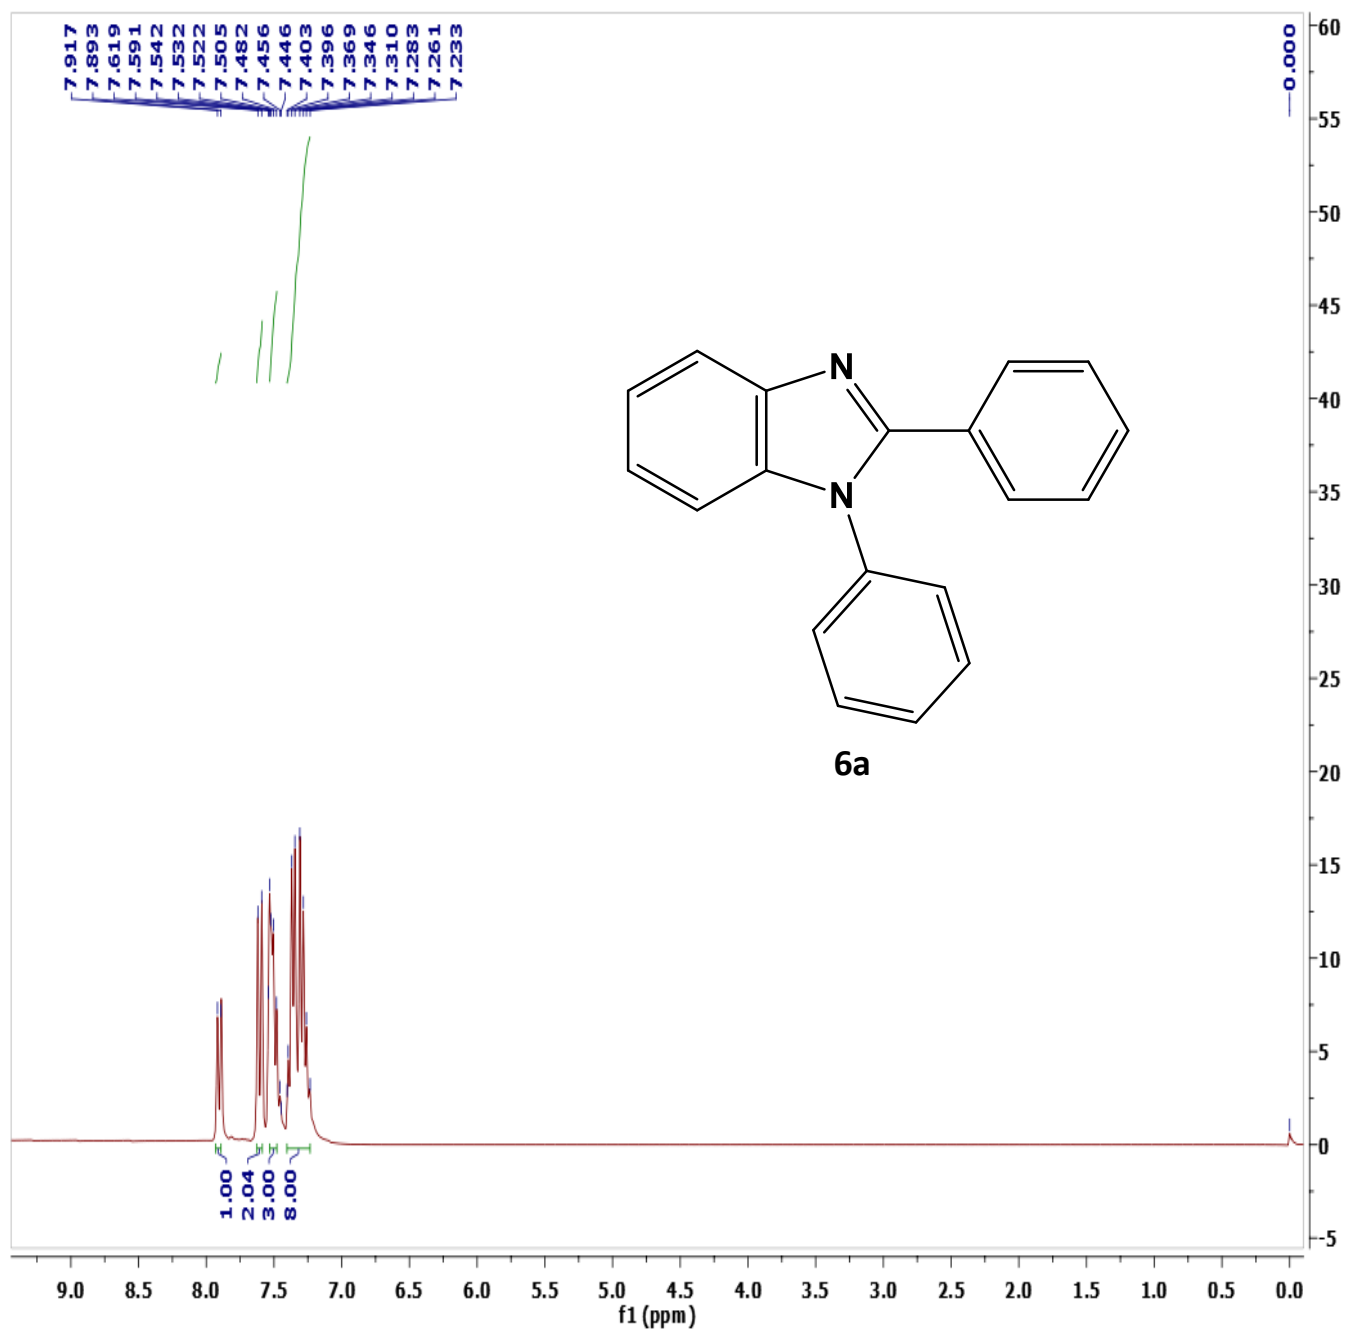

**Fig. S21** <sup>1</sup>H NMR of compound **6a** in CDCl<sub>3</sub>.

Compound **6b**.<sup>12</sup> 4-(1-Phenyl-1*H*-benzo[*d*]imidazol-2-yl)phenol: (0.112 g in 76% yield). <sup>1</sup>H NMR (300 MHz, DMSO-*d*<sub>6</sub>, ppm) δ = 7.73 (d, 1H, J = 7.5 Hz), 7.50–7.57 (m, 3H), 7.40 (d, 2H, J = 7.5 Hz), 7.35 (d, 2H, J = 8.4 Hz), 7.28 (t, 1H, J = 7.2 Hz), 7.19 (t, 1H, J = 7.2 Hz), 7.10 (d, 1H, J = 8.1 Hz), 6.68 (d, 2H, J = 8.4 Hz).

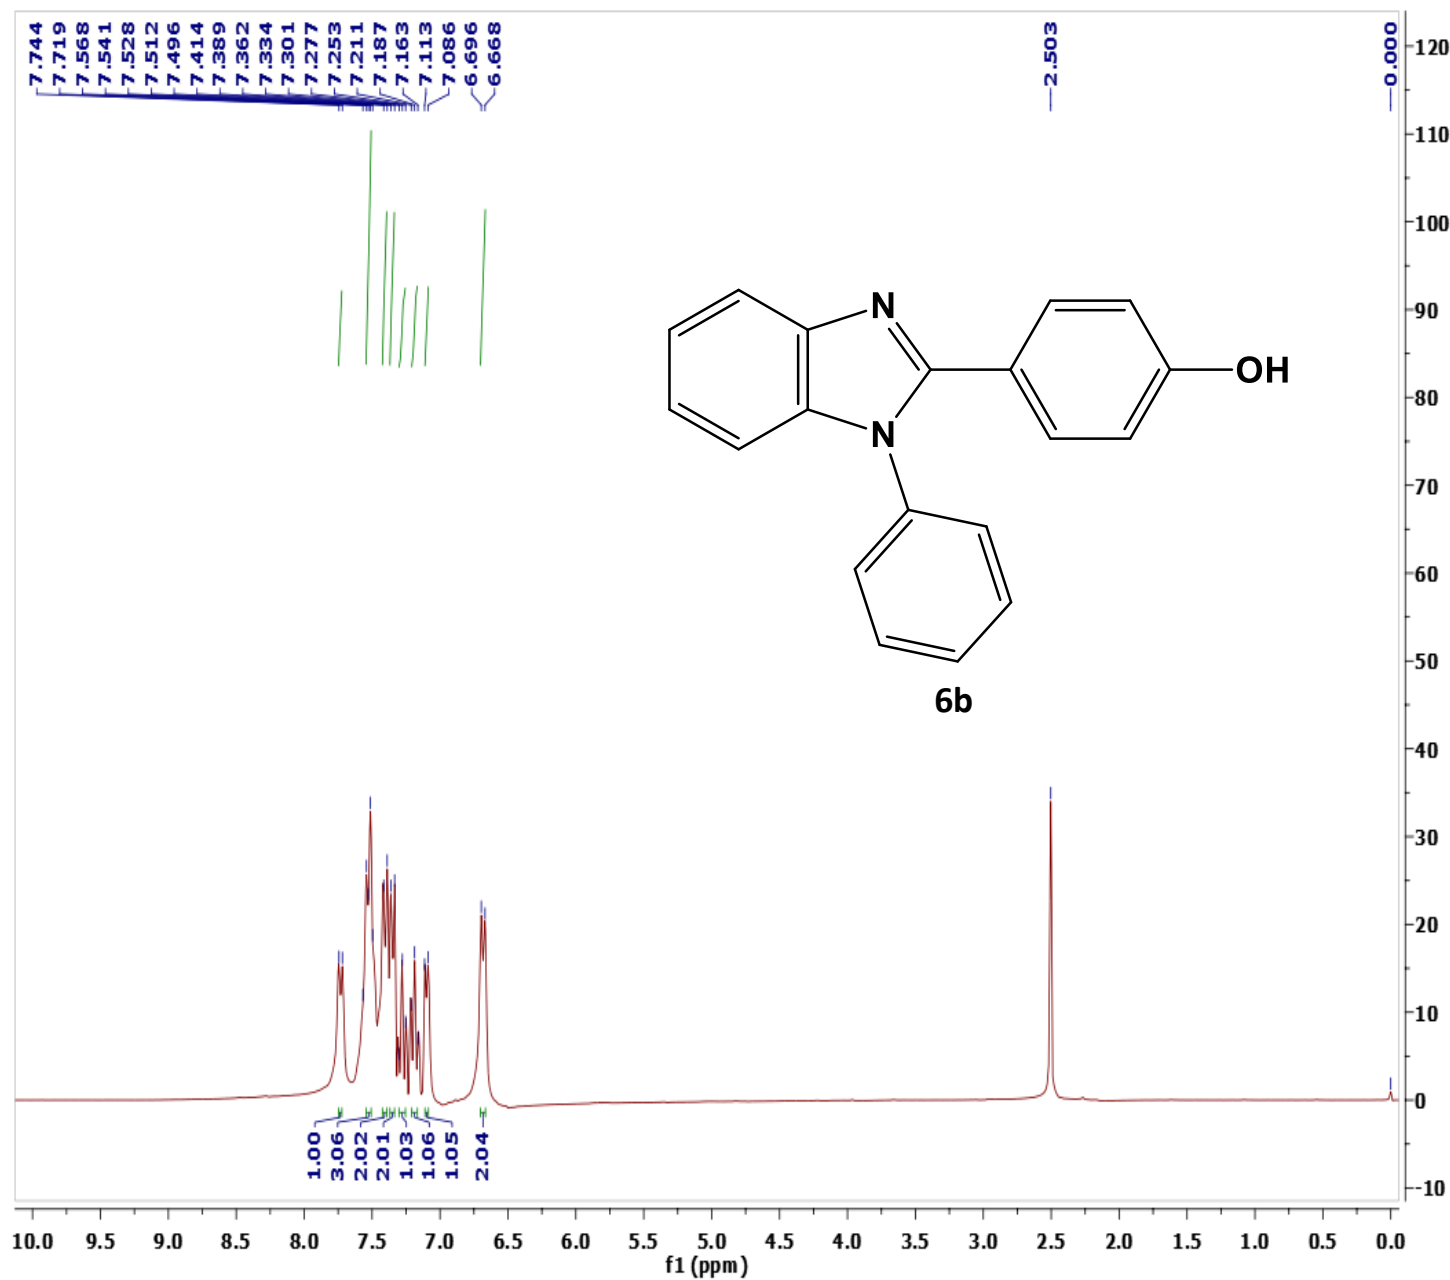

Fig. S22 <sup>1</sup>H NMR of compound **6b** in DMSO-*d*<sub>6</sub>.

Compound **6c**.<sup>13</sup> 2-(3,4-dimethoxyphenyl)-1-phenyl-1*H*-benzo[*d*]imidazole: (0.143 g in 84% yield). <sup>1</sup>H NMR (300 MHz, CDCl<sub>3</sub>, ppm): δ = 7.86 (d, 1H, J = 8.1 Hz), 7.46–7.56 (m, 3H), 7.27–7.36 (m, 3H), 7.14–7.19 (m, 3H), 7.10–7.11 (m, 1H), 6.73 (d, 1H, J = 8.4 Hz), 3.85 (s, 3H), 3.70 (s, 3H).

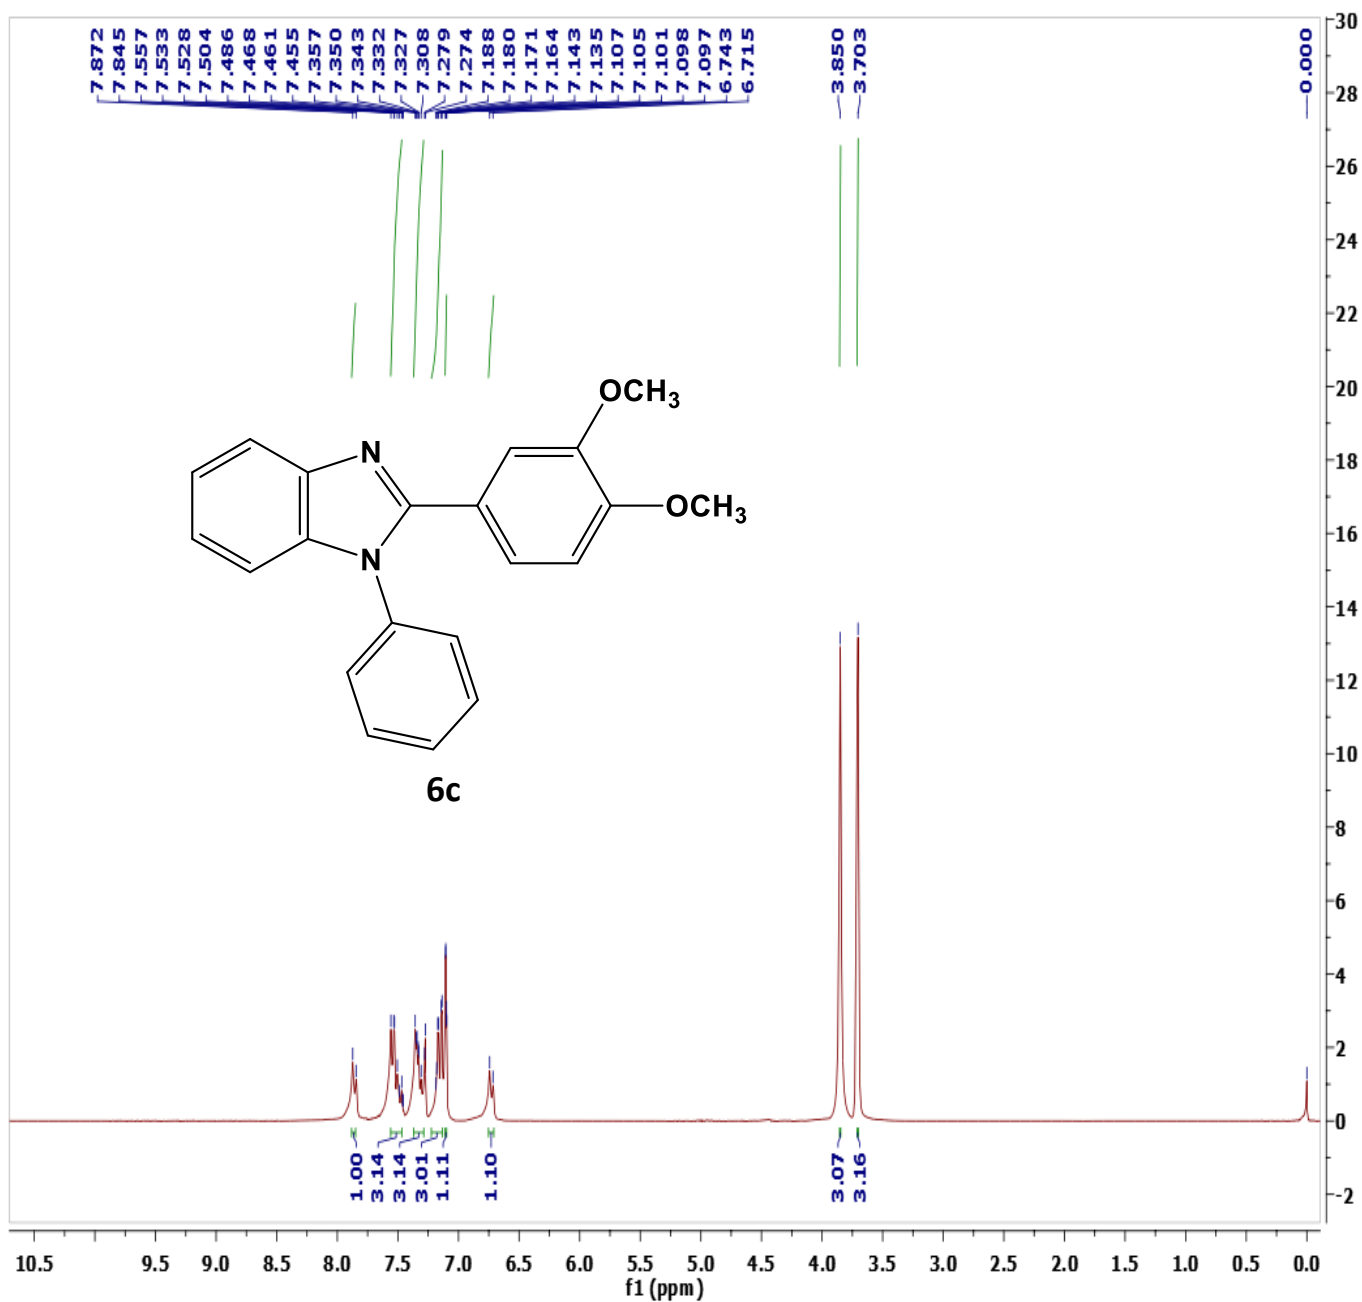

Fig. S23 <sup>1</sup>H NMR of compound **6c** in CDCl<sub>3</sub>.

Compound **6d**.<sup>14</sup> 2-(4-Methylphenyl)-1-phenyl-1*H*-benzo[*d*]imidazole: (0.114 g in 78% yield). <sup>1</sup>H NMR (300 MHz, CDCl<sub>3</sub>, ppm): δ = 7.89 (s, 1H), 7.45–7.51 (m, 5H), 7.33–7.35 (m, 3H), 7.25–7.27 (m, 2H), 7.12 (d, 2H, J = 8.7 Hz), 2.32 (s, 3H).

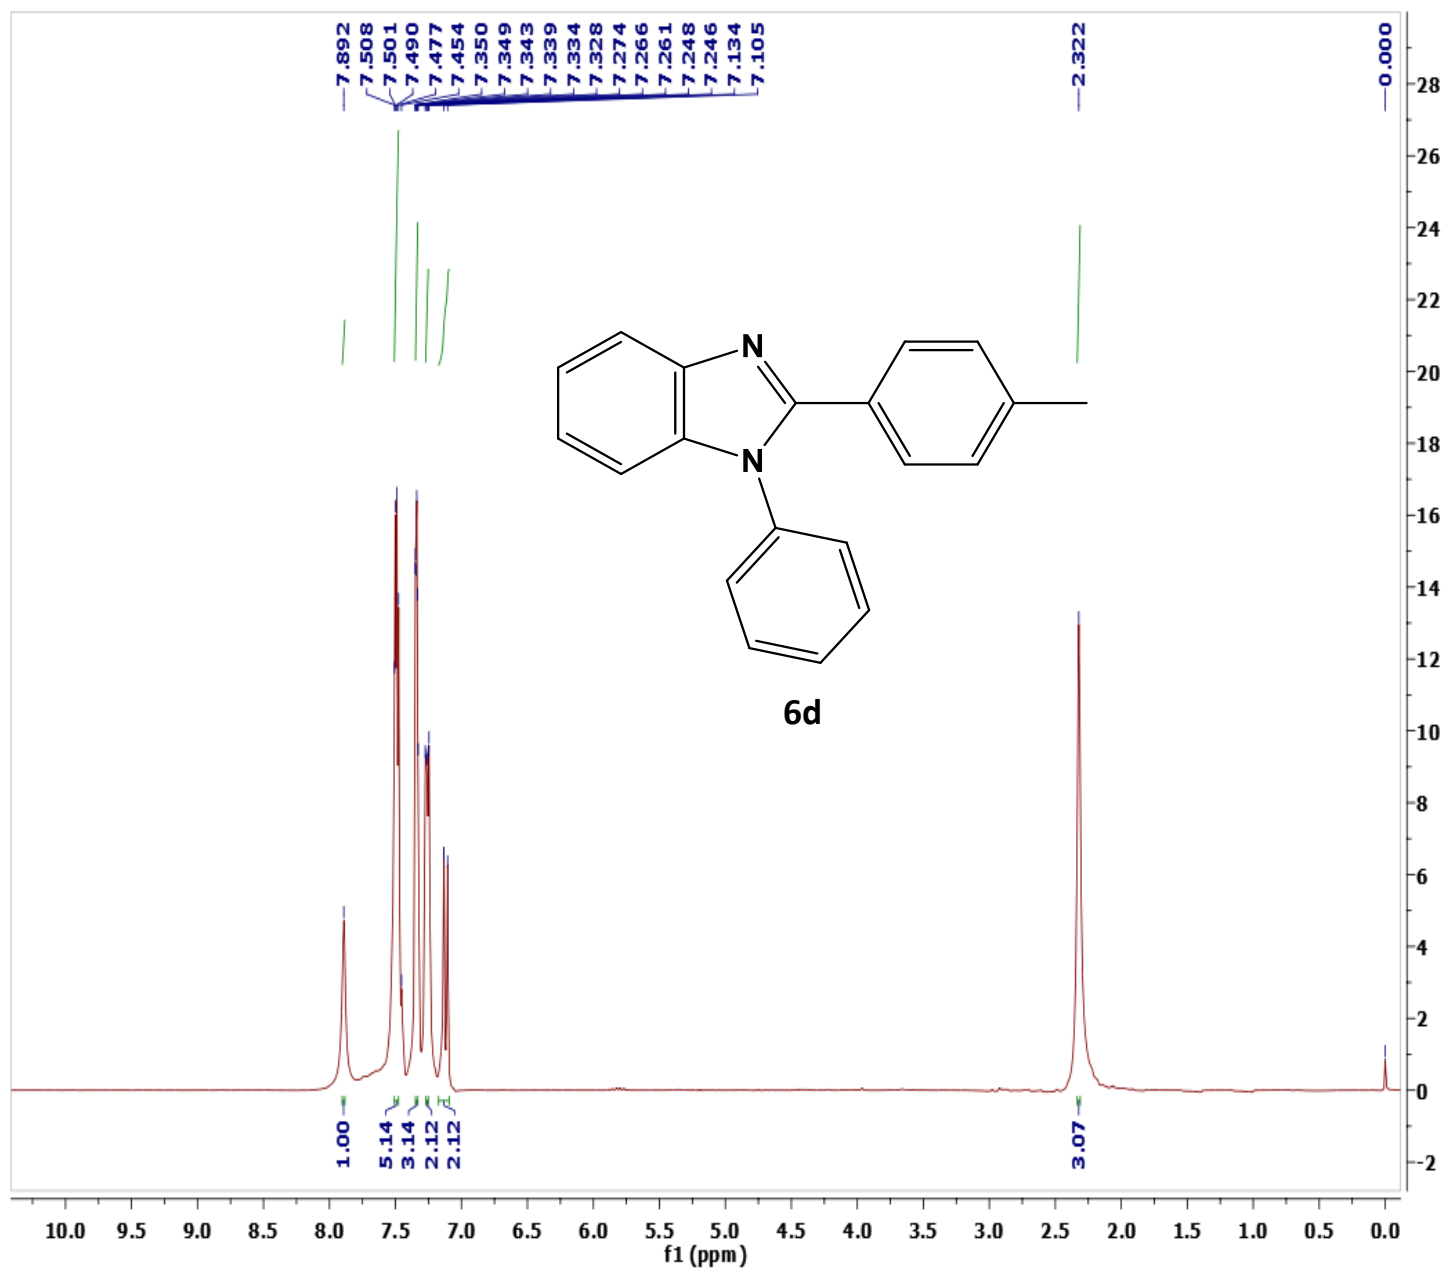

Fig. S24 <sup>1</sup>H NMR of compound **6d** in CDCl<sub>3</sub>.

Compound **6e**.<sup>15</sup> 4-(1-Phenyl-1*H*-benzo[*d*]imidazol-2-yl)benzaldehyde: (0.108 g in 70% yield). <sup>1</sup>H NMR (500 MHz, CDCl<sub>3</sub>, ppm): δ = 9.98 (s, 1 H), 7.91–7.94 (m, 1H), 7.83 (d, 2 H, J = 8.5 Hz), 7.75 (d, 2 H, J = 8.5 Hz), 7.53–7.58 (m, 3 H), 7.28–7.36 (m, 5 H).

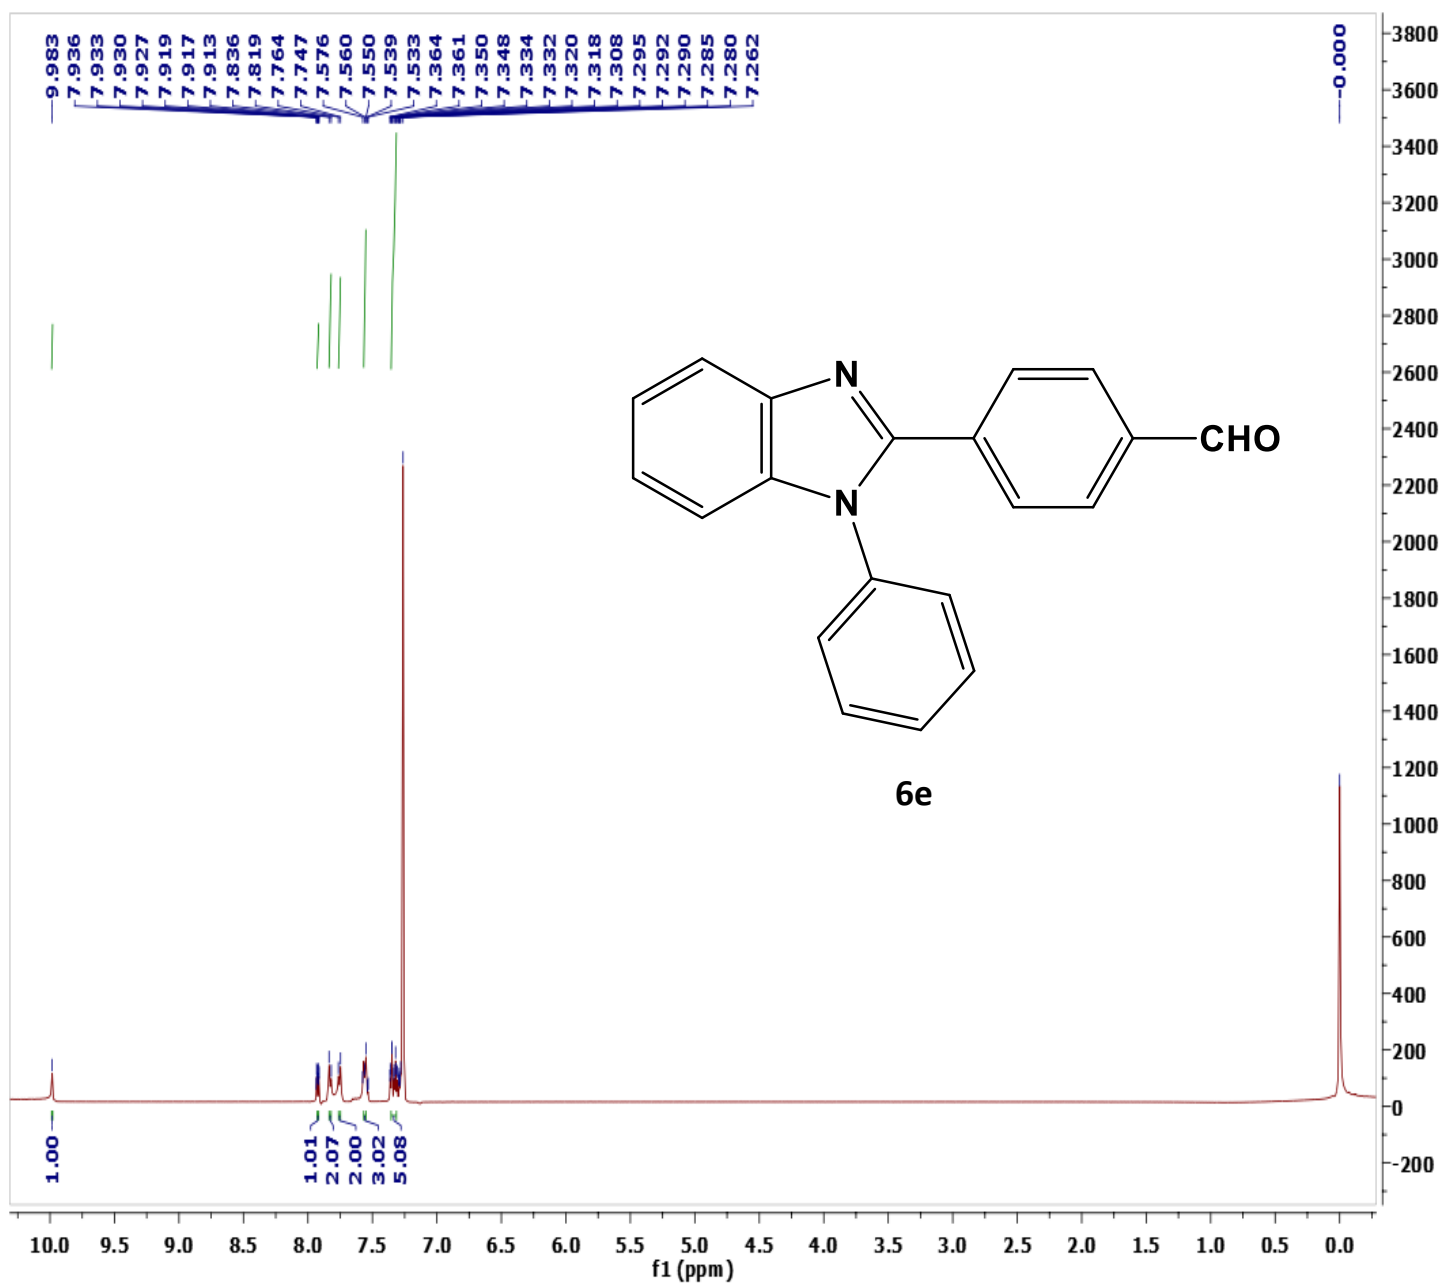

Fig. S25 <sup>1</sup>H NMR of compound **6e** in CDCl<sub>3</sub>.

Compound **1a**: (0.06 g in 57.5% yield).  $^1\text{H}$  NMR (500 MHz,  $\text{CDCl}_3$ , ppm)  $\delta = 7.73$  (d, 4H,  $J = 8.0$  Hz), 7.32 (d, 4H,  $J = 8.0$  Hz), 7.02 (d, 4H,  $J = 8.0$  Hz), 6.80 (d, 4H,  $J = 8.0$  Hz), 6.67-6.70 (m, 20H).

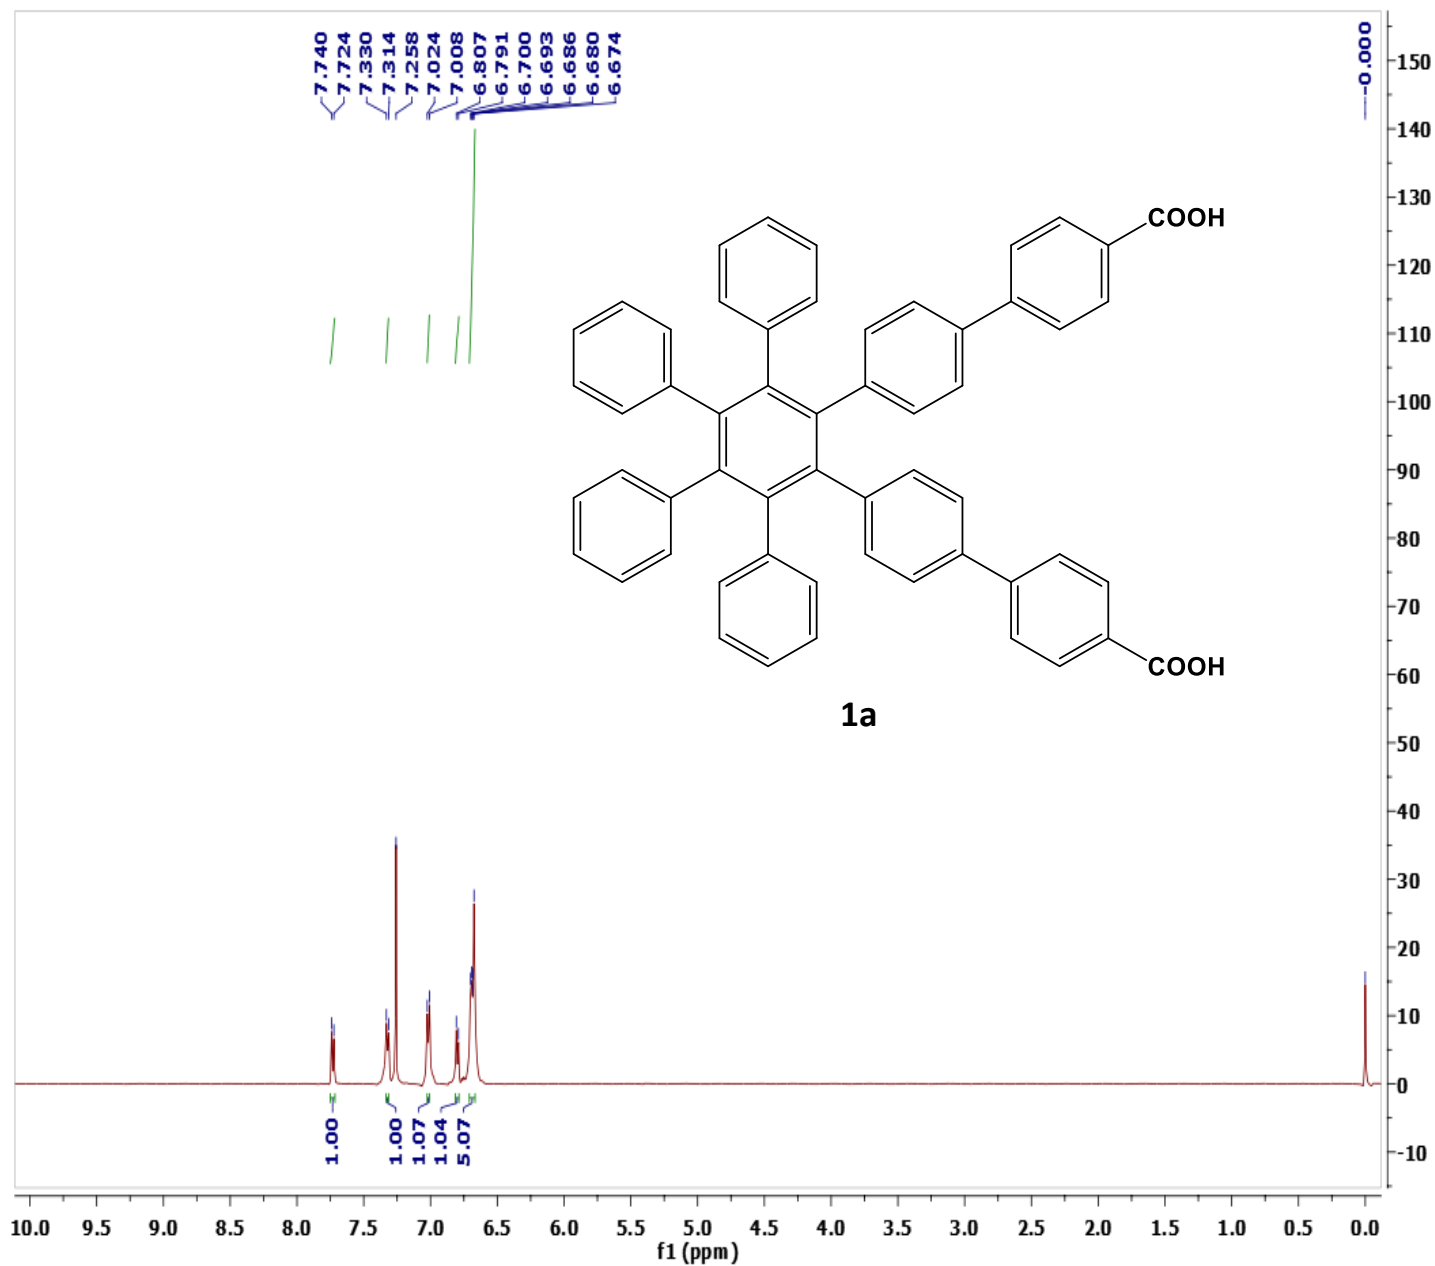

Fig. S26  $^1\text{H}$  NMR of derivative **1a** in  $\text{CDCl}_3$ .



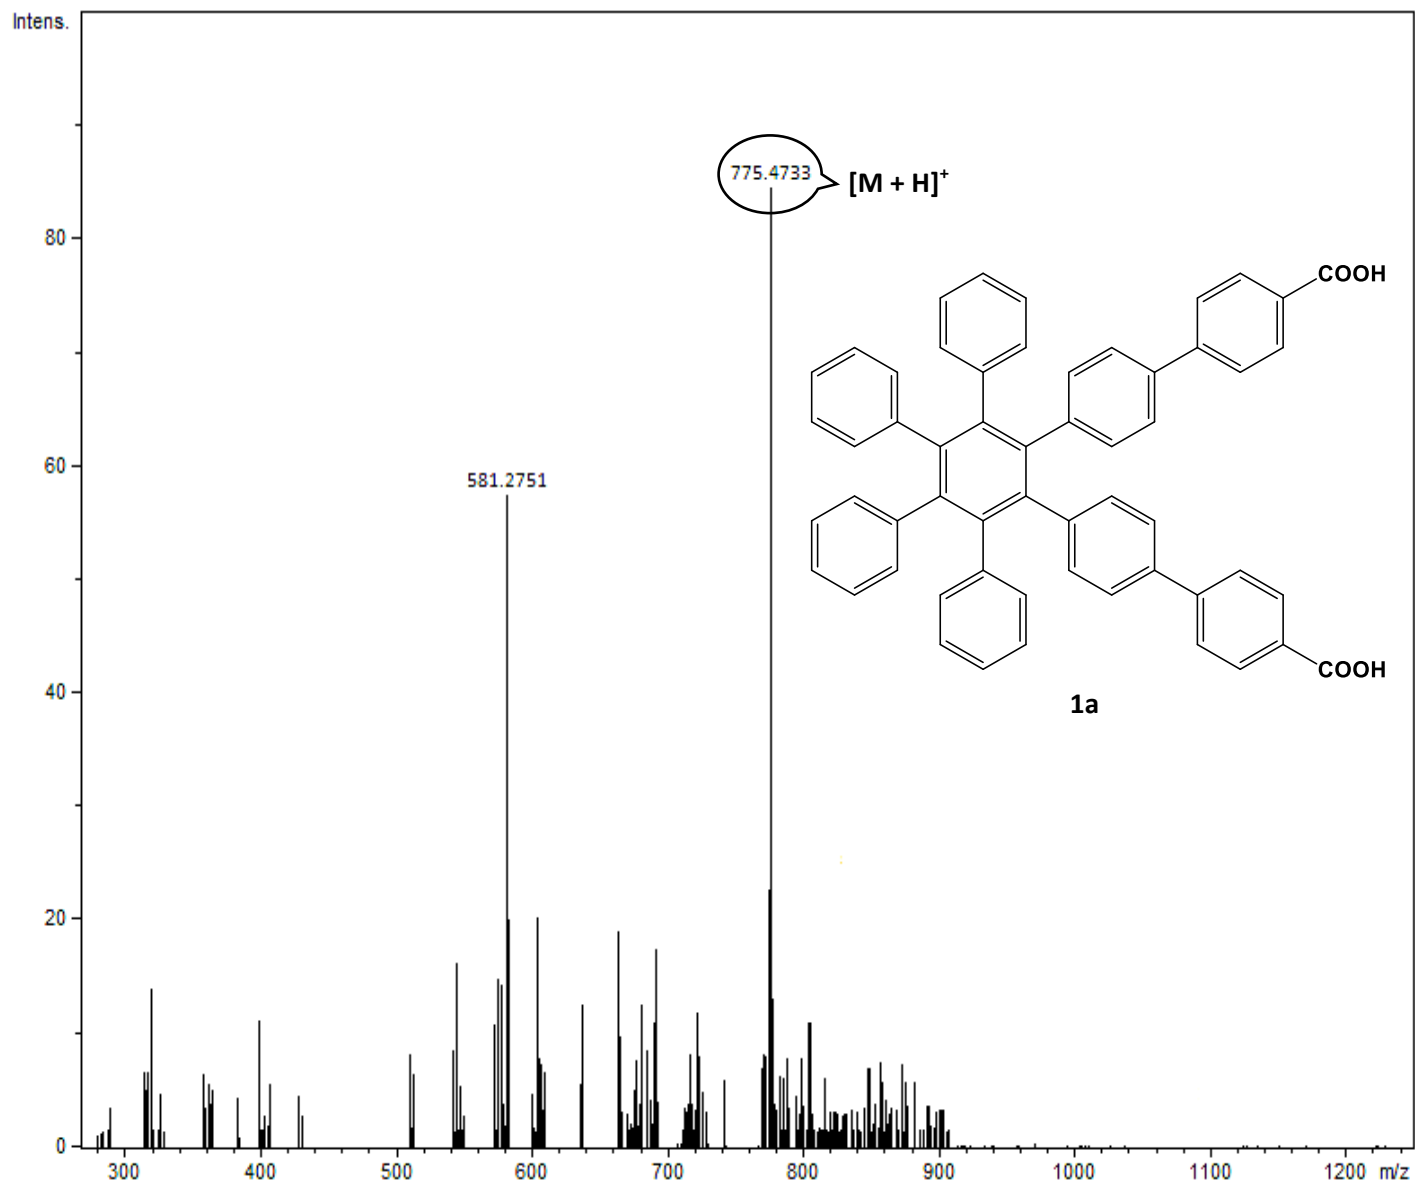

**Fig. S27** Mass spectrum of derivative **1a**.

- 
- <sup>1</sup> K. Sharma, G. Singh, G. Singh, M. Kumar and V. Bhalla, *RSC Adv.*, 2015, **5**, 25781.
- <sup>2</sup> (a) Y. Zhang, W. Zhu, Y.-L. Liu, H. Wang, K. Wang, K. Li, J. H. No, L. Ayong, A. Gulati, R. Pang, L. F. -Junior, C. T. Morita and E. Oldfield, *ACS Med. Chem. Lett.* 2013, **4**, 423; (b) L.-H. Zou, J. Reball, J. Mottweiler and C. Bolm, *Chem. Commun.*, 2012, **48**, 11307.
- <sup>3</sup> M. Luty-Błocho, K. Paclawski, M. Wojnicki and K. Fitzner, *Inorg. Chim. Acta*, **2013**, 395, 189.
- <sup>4</sup> (a) T. K. Sau and C. J. Murphy, *Langmuir*, 2004, **20**, 6414; (b) S. Goswami, S. Das, K. Aich, D. Sarkar, T. K. Mondal, C. K. Quah and H.-K. Fun, *Dalton Trans.* 2013, **42**, 15113.
- <sup>5</sup> J. Li, S. K. Cushing, J. Bright, F. Meng, T. R. Senty, P. Zheng, A. D. Bristow and N. Q. Wu, *ACS Catal.*, 2013, **3**, 47.
- <sup>6</sup> K. Sharma, M. Kumar and V. Bhalla, *Chem. Commun.*, 2015, **51**, 12529.
- <sup>7</sup> Z.-S. Gu, W.-X. Chen and L.-X. Shao, *J. Org. Chem.*, 2014, **79**, 5806.
- <sup>8</sup> K. Goossens, S. Wellens, K. V. Hecke, L. V. Meervelt, T. Cardinaels and K. Binnemans, *Chem. Eur. J.*, 2011, **17**, 4291.
- <sup>9</sup> M. J. Iglesias, A. Prieto and M. C. Nicasio, *Org. Lett.*, 2012, **14**, 4318.
- <sup>10</sup> P. V. Kumar, W.-S. Lin, J.-S. Shen, D. Nandi and H. M. Lee, *Organometallics*, 2011, **30**, 5160.
- <sup>11</sup> K. Muto, T. Hatakeyama, J. Yamaguchi and K. Itami, *Chem. Sci.*, 2015, **6**, 6792
- <sup>12</sup> W.-S. Huang, C.-W. Lin, J. T. Lin, J.-H. Huang, C.-W. Chu, Y.-H. Wu and H.-C. Lin, *Org. Electron.*, 2009, **10**, 594.
- <sup>13</sup> S. I. Bezzubov, V. D. Doljenko, S. I. Troyanov and Y. M. Kiselev, *Inorg. Chim. Acta*, 2014, **415**, 22.
- <sup>14</sup> J. Jayabharathi, V. Thanikachalam and K. Jayamoorthy, *Photochem. Photobiol. Sci.*, 2013, **12**, 1761.
- <sup>15</sup> M. Debeaux, M. W. Thesen, D. Schneidenbach, H. Hopf, S. Janietz, H. Kruger, A. Wedel, W. Kowalsky and H.-H. Johannes, *Adv. Funct. Mater.*, 2010, **20**, 399.
